# Supplementary material
Source: PubMed Central journal article supplement (PMC4685943)
Supplement: cb5b00655_si_001.pdf [file cb5b00655_si_001.pdf]

## Supplementary Information

### **Development of DDR2 inhibitors for the treatment of *DDR2* mutated non-small cell lung cancer**

Hideki Terai<sup>1,+</sup>, Li Tan<sup>2,3,+</sup>, Ellen M. Beauchamp<sup>1</sup>, John M. Hatcher<sup>2,3</sup>, Qingsong Liu<sup>2,3</sup>, Matthew Meyerson<sup>1,4,5</sup>, Nathanael S. Gray<sup>2,3,\*</sup> and Peter S. Hammerman<sup>1,5,\*</sup>

<sup>1</sup>Department of Medical Oncology, Dana-Farber Cancer Institute, Boston MA

<sup>2</sup>Department of Cancer Biology, Dana-Farber Cancer Institute, Boston MA

<sup>3</sup>Department of Biological Chemistry and Molecular Pharmacology, Harvard Medical School, Boston MA

<sup>4</sup>Department of Pathology, Brigham and Women's Hospital, Boston MA

<sup>5</sup>Cancer Program, Broad Institute of Harvard and MIT, Cambridge MA

<sup>+</sup>These authors contributed equally to this work

### Synthetic procedures of compound 3.

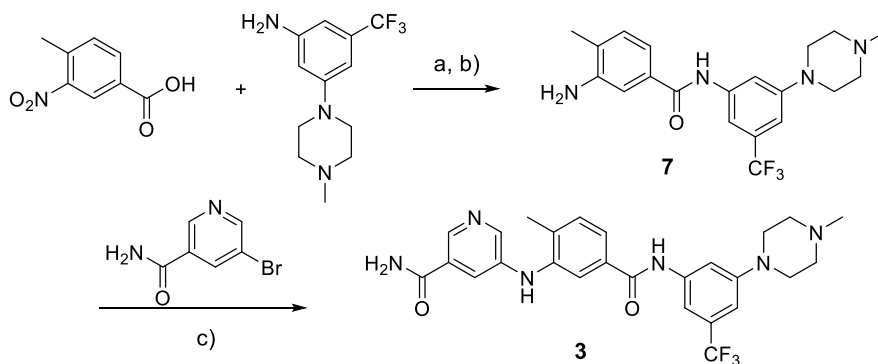

**Scheme S1.** Reagents and conditions: a) HATU, DIEA,  $\text{CH}_2\text{Cl}_2$ , b)  $\text{SnCl}_2 \cdot \text{H}_2\text{O}$ , ethyl acetate, ethanol, c) 5-bromonicotinamide,  $\text{Pd}_2(\text{dba})_3$ , XPhos,  $\text{K}_2\text{CO}_3$ , *t*-butanol, 75 °C.

#### 3-amino-4-methyl-N-(3-(4-methylpiperazin-1-yl)-5-(trifluoromethyl)phenyl)benzamide (7)

To a stirred solution of 4-methyl-3-nitrobenzoic acid (2.17 g, 12 mmol) and 3-(4-methylpiperazin-1-yl)-5-(trifluoromethyl)aniline (2.60 g, 10 mmol) in 50 mL of dichloromethane was added HATU (4.56 g, 12 mmol), DMAP (1.47 g, 1.2 mmol) and DIEA (5.23 mL, 30 mmol). The reaction mixture was allowed to stand for 24 hr at room temperature, then eluted with ethyl acetate and washed with water, the organic phase was concentrated and purified with column chromatography (dichloromethane : methanol 15:1) to give a colorless oil. To a stirred solution of the obtained oil (422 mg, 1 mmol) in ethyl acetate (10 mL) and ethanol (1 mL) was added  $\text{SnCl}_2 \cdot 2\text{H}_2\text{O}$  (902 mg, 4 mmol). The reaction mixture was allowed to stand for 2 hr at 80 °C. When LC-MS showed most starting material was converted, the reaction mixture was cooled to RT, and added saturated  $\text{NaHCO}_3$  solution and stir for at 0.5 hr, extracted with ethyl acetate, the organic phase was concentrated and dried. 305 mg (78% yield for 2 step) of x was obtained without further purification. MS  $m/z$  393  $[\text{M}+1]$ .

#### 5-((2-methyl-5-((3-(4-methylpiperazin-1-yl)-5-(trifluoromethyl)phenyl)carbamoyl)phenyl)amino)nicotinamide (3)

To a solution of x (40 mg, 0.1 mmol) in *t*-butanol (1.2 mL) was added 5-bromonicotinamide (20 mg, 0.1 mmol) and  $\text{K}_2\text{CO}_3$  (42 mg, 0.3 mmol). The reaction mixture was degassed for 5 min and then  $\text{Pd}_2(\text{dba})_3$  (11 mg, 0.015 mmol) and XPhos (8.6 mg, 0.018 mmol) were added. The reaction flask was stirred at 75 °C for 4 hr. After cooling to room temperature, the reaction mixture was filtered through a pad of celite and concentrated. Purification by HPLC gave 46 mg (TFA salt, 73% yield) of

the title compound as a pale yellow solid.  $^1\text{H}$  NMR 600 MHz (DMSO- $d_6$ , TFA salt)  $\delta$ 10.29 (s, 1H), 10.30 (s, 1H), 9.92 (br, 1H), 8.49 (s, 1H), 8.38 (s, 1H), 8.09 (s, 1H), 8.05 (s, 1H), 7.78 (s, 1H), 7.73 (s, 1H), 7.66 (s, 1H), 7.64 (m, 2H), 7.52 (s, 1H), 7.43 (d,  $J$  = 8.4 Hz, 1H), 3.90 (m, 2H), 3.54 (m, 2H), 3.16 (m, 2H), 3.06 (m, 2H), 2.90-3.06 (m, 4H), 2.86 (s, 3H), 2.29 (s, 3H). MS  $m/z$  513 [M+1].

#### Synthetic procedures of compound 4.

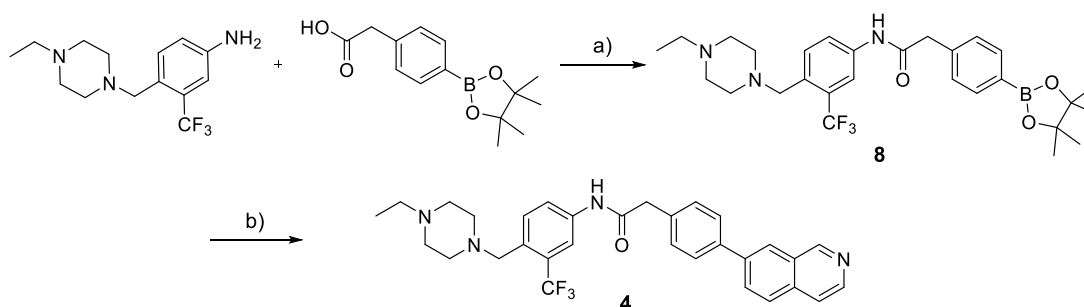

**Scheme S2.** Reagents and conditions: a) HATU, DIEA, DMF, b) 7-bromoisoquinoline, Pd(dppf)Cl<sub>2</sub>, *t*-BuXPhos, Na<sub>2</sub>CO<sub>3</sub>, 1,4-dioxane, 100 °C.

***N*-(4-((4-ethylpiperazin-1-yl)methyl)-3-(trifluoromethyl)phenyl)-2-(4-(4,4,5,5-tetramethyl-1,3,2-dioxaborolan-2-yl)phenyl)acetamide (8)** To a solution of 4-((4-ethylpiperazin-1-yl)methyl)-3-(trifluoromethyl)aniline (100 mg, 0.348 mmol), 2-(4-(4,4,5,5-tetramethyl-1,3,2-dioxaborolan-2-yl)phenyl)acetic acid (91 mg, 0.348 mmol) and HATU (265 mg, 0.696 mmol) was added DIEA (303  $\mu$ L, 1.74 mmol). The mixture was stirred for 0.5 hr then H<sub>2</sub>O (50 mL) was added followed by extraction with ethyl acetate. The combined organic layers were dried over MgSO<sub>4</sub>, filtered and condensed. The crude product was purified by flash column chromatography using a 9:1 v/v dichloromethane:methanol mixture as solvent to afford the title compound 174 mg (94% yield) as a white solid. MS  $m/z$  532.19 [M+1].

***N*-(4-((4-ethylpiperazin-1-yl)methyl)-3-(trifluoromethyl)phenyl)-2-(4-(isoquinolin-7-yl)phenyl)acetamide (4)** To a solution of **8** (174 mg, 0.327 mmol) in a mixture of 1,4-dioxane (5 mL) and 2M Na<sub>2</sub>CO<sub>3</sub> solution (1 mL) was added 7-bromoisoquinoline (68 mg, 0.327 mmol). The reaction mixture was degassed for 5 min and then Pd(dppf)Cl<sub>2</sub> (14.35 mg, 0.019 mmol) and *t*-BuXPhos (11 mg, 0.026 mmol) were added. The reaction flask was stirred at 100 °C for 2 hr. After cooling to room temperature, the reaction mixture was filtered through a pad of celite and

partitioned between ethyl acetate and water. The organic layer was separated and the aqueous layer was extracted with ethyl acetate. The combined organic extracts were washed with brine, dried over  $\text{MgSO}_4$ , filtered and concentrated. Purification by HPLC gave the title compound 130 mg (TFA salt, 62% yield) as a light-brown solid.  $^1\text{H}$  NMR 400 MHz ( $\text{DMSO-d}_6$ , TFA salt)  $\delta$  10.62 (s, 1H), 9.69 (s, 1H), 8.65 (m, 2H), 8.4 (m, 1H), 8.25 (m, 2H), 8.1 (s, 1H), 7.85 (d,  $J = 8.0$  Hz, 3H), 7.68 (d,  $J = 8.0$  Hz, 1H), 7.53 (d,  $J = 8.0$  Hz, 2H), 3.79 (s, 2H), 3.66 (s, 2H), 3.45 (m, 2H), 3.15 (q,  $J = 8.0$  Hz, 2H), 2.94 (m, 4H), 2.4 (m, 2H), 1.2 (t,  $J = 8.0$  Hz, 3H);  $^{13}\text{C}$  NMR 100 MHz ( $\text{DMSO-d}_6$ )  $\delta$  169.93, 152.14, 150.30, 148.10, 140.73, 139.11, 137.28, 136.58, 133.19, 132.13, 130.56, 128.16, 127.56, 126.39, 123.18, 56.92, 50.97, 49.75, 44.64, 43.34, 9.38; MS  $m/z$ : 533.74  $[\text{M}+1]$ .

### Synthetic procedures of compound 5.

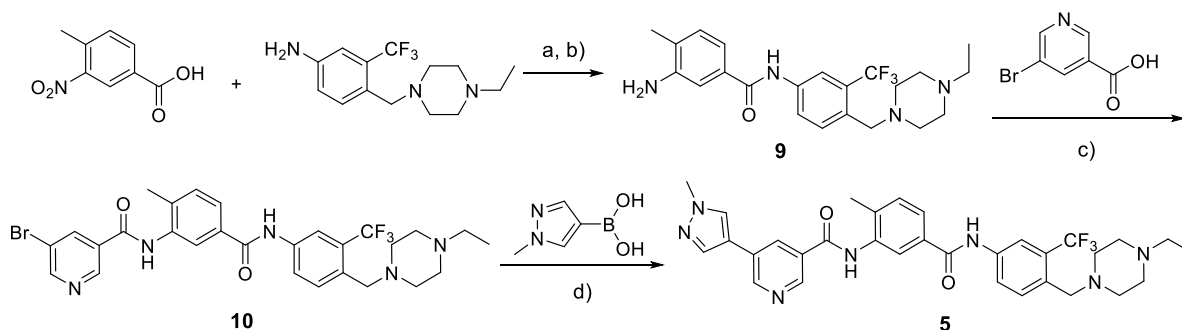

**Scheme S3.** Reagents and conditions: a) HATU, DIEA,  $\text{CH}_2\text{Cl}_2$ , b)  $\text{SnCl}_2 \cdot \text{H}_2\text{O}$ , ethyl acetate, ethanol,  $80^\circ\text{C}$ , c) 5-bromonicotinic acid, HATU, DIEA,  $\text{CH}_2\text{Cl}_2$ , d) (1-methyl-1H-pyrazol-4-yl)boronic acid,  $\text{Pd}(\text{dppf})\text{Cl}_2$ ,  $\text{Na}_2\text{CO}_3$ , 1,4-dioxane,  $\text{H}_2\text{O}$ ,  $75^\circ\text{C}$ .

### 3-amino-N-(4-((4-ethylpiperazin-1-yl)methyl)-3-(trifluoromethyl)phenyl)-4-

**methylbenzamide (9).** To a stirred solution of 4-methyl-3-nitrobenzoic acid (2.17 g, 12 mmol) and 4-((4-ethylpiperazin-1-yl)methyl)-3-(trifluoromethyl)aniline (2.87 g, 10 mmol) in 50 mL of dichloromethane was added HATU (4.56 g, 12 mmol), DMAP (1.47 g, 1.2 mmol) and DIEA (5.23 mL, 30 mmol). The reaction mixture was allowed to stand for 24 hr at room temperature, then eluted with ethyl acetate and washed with water, the organic phase was concentrated and purified with column chromatography (dichloromethane : methanol 15:1) to give a pale yellow oil. To a stirred solution of the obtained oil (450 mg, 1 mmol) in ethyl acetate (10 mL) and ethanol (1 mL) was added  $\text{SnCl}_2 \cdot 2\text{H}_2\text{O}$  (902 mg, 4 mmol). The reaction mixture was allowed to stand for 2 hr at  $80^\circ\text{C}$ . When LC-MS showed most starting material was converted, the reaction

mixture was cooled to RT, and added saturated NaHCO<sub>3</sub> solution and stir for at 0.5 hr, extracted with ethyl acetate, the organic phase was concentrated and dried. 336 mg (80% yield for 2 step) of **x** was obtained without further purification. MS m/z 421 [M+1].

**5-bromo-N-(5-((4-((4-ethylpiperazin-1-yl)methyl)-3-(trifluoromethyl)phenyl)carbamoyl)-2-methylphenyl)nicotinamide (10)** To a stirred solution of compound **x** (420 mg, 1 mmol) and 5-bromonicotinic acid (245 mg, 1.2 mmol) in 5 mL of dichloromethane was added HATU (456 mg, 1.2 mmol), DMAP (147 mg, 1.2 mmol) and DIEA (523 µL, 3 mmol). The reaction mixture was allowed to stand for 24 hr at room temperature, then eluted with ethyl acetate and washed with water, the organic phase was concentrated and purified with column chromatography (dichloromethane : methanol = 15:1) to give 514 mg (85% yield) of **x** as a white solid. MS m/z 604 [M+1].

**N-(5-((4-((4-ethylpiperazin-1-yl)methyl)-3-(trifluoromethyl)phenyl)carbamoyl)-2-methylphenyl)-5-(1-methyl-1*H*-pyrazol-4-yl)nicotinamide (5)** To a solution of **x** (60 mg, 0.1 mmol) in a mixture of 1,4-dioxane (0.75 mL) and water (0.15 mL) was added (1-methyl-1*H*-pyrazol-4-yl)boronic acid (19 mg, 0.15 mmol) and Na<sub>2</sub>CO<sub>3</sub> (42 mg, 0.4 mmol). The reaction mixture was degassed for 5 min and then Pd(dppf)Cl<sub>2</sub> (16 mg, 0.02 mmol) was added. The reaction flask was stirred at 75 °C for 5 hr. After cooling to room temperature, the reaction mixture was filtered through a pad of celite and concentrated. Purification by HPLC gave 55 mg (TFA salt, 77% yield) of the title compound as a pale yellow solid. <sup>1</sup>H NMR 600 MHz (DMSO-d<sub>6</sub>, TFA salt) δ 10.53 (s, 1H), 10.30 (s, 1H), 9.34 (br, 1H), 9.06 (s, 1H), 8.97 (s, 1H), 8.50 (s, 1H), 8.38 (s, 1H), 8.23 (s, 1H), 8.13 (d, *J* = 8.1 Hz, 1H), 8.08 (s, 1H), 8.04 (s, 1H), 7.87 (d, *J* = 7.8 Hz, 1H), 7.72 (d, *J* = 8.4 Hz, 1H), 7.50 (d, *J* = 8.4 Hz, 1H), 3.92 (s, 1H), 3.70 (s, 1H), 3.47 (m, 2H), 3.15 (m, 2H), 2.90-3.06 (m, 4H), 2.40 (m, 2H), 2.37 (s, 3H), 1.22 (t, *J* = 8.4 Hz, 3H). MS m/z 606 [M+1].

## Supplementary Figure 1. Characterization of compound 1-6.

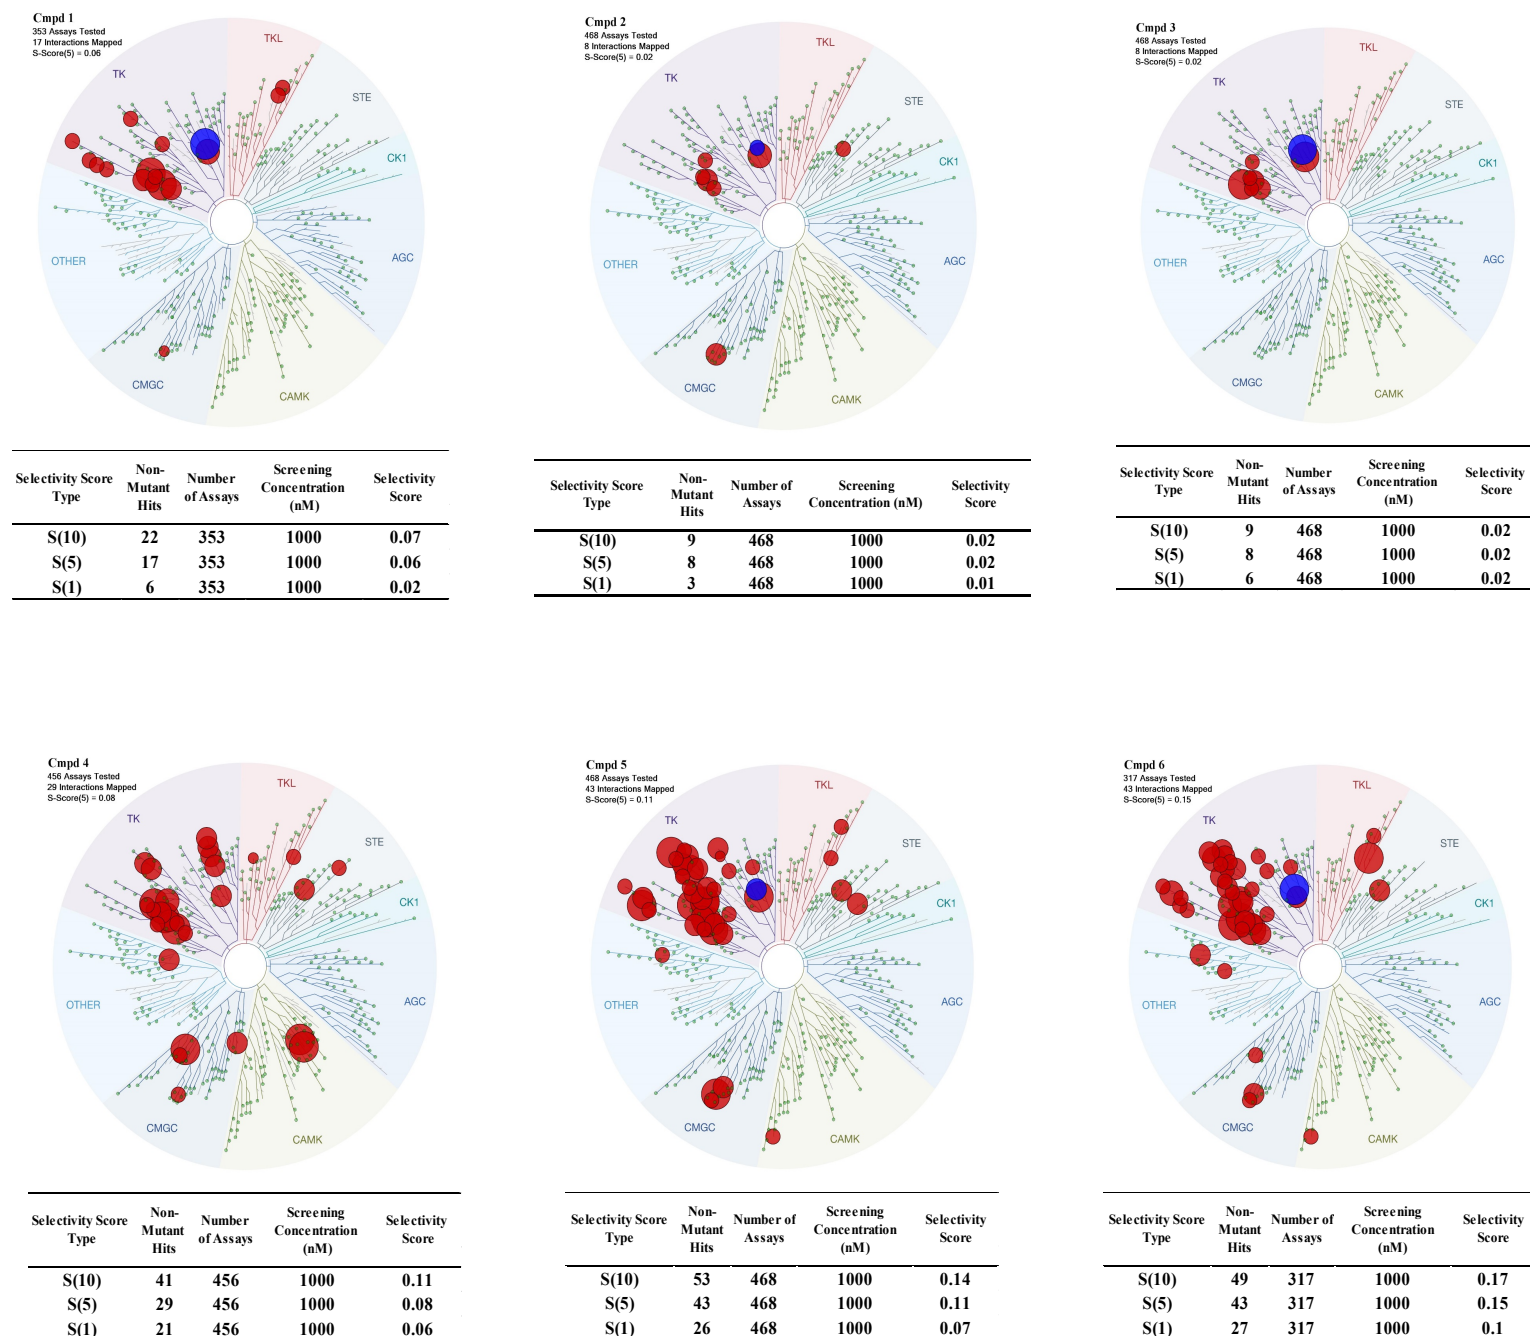

KinomeScan™ kinase selectivity profiles, S(1), S(5) and S(10) scores for **1-6**. These compounds were profiled at a concentration of 1  $\mu$ M against a diverse panel of 353 kinases by DiscoverX.

**Supplementary Figure 2. Comparison of the potency of DDR2 inhibitors against wild-type and mutant DDR2.**

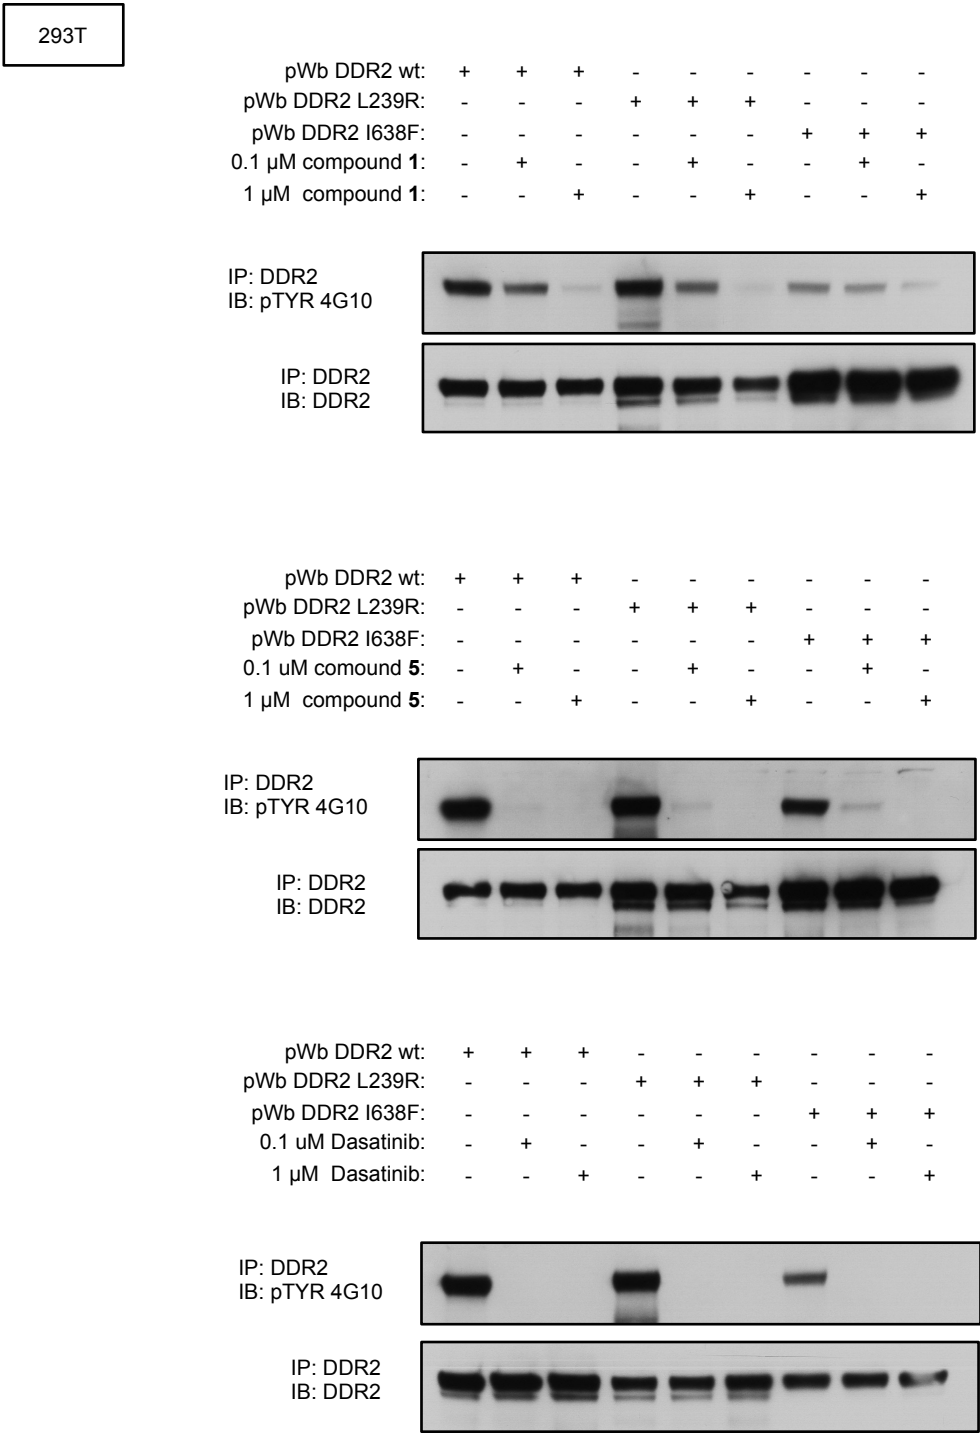

Western blotting for anti-phosphotyrosine after immunoprecipitation for anti-DDR2 with cell lysates of 293T cells. These cells ectopically expressed DDR2 WT, DDR2 L239R or DDR2 I638F. Cells were treated with the indicated concentration of **1**, **5** or dasatinib.

### Supplementary Figure 3. Characterization of selective DDR2 inhibitors compounds 2, 3 and 4.

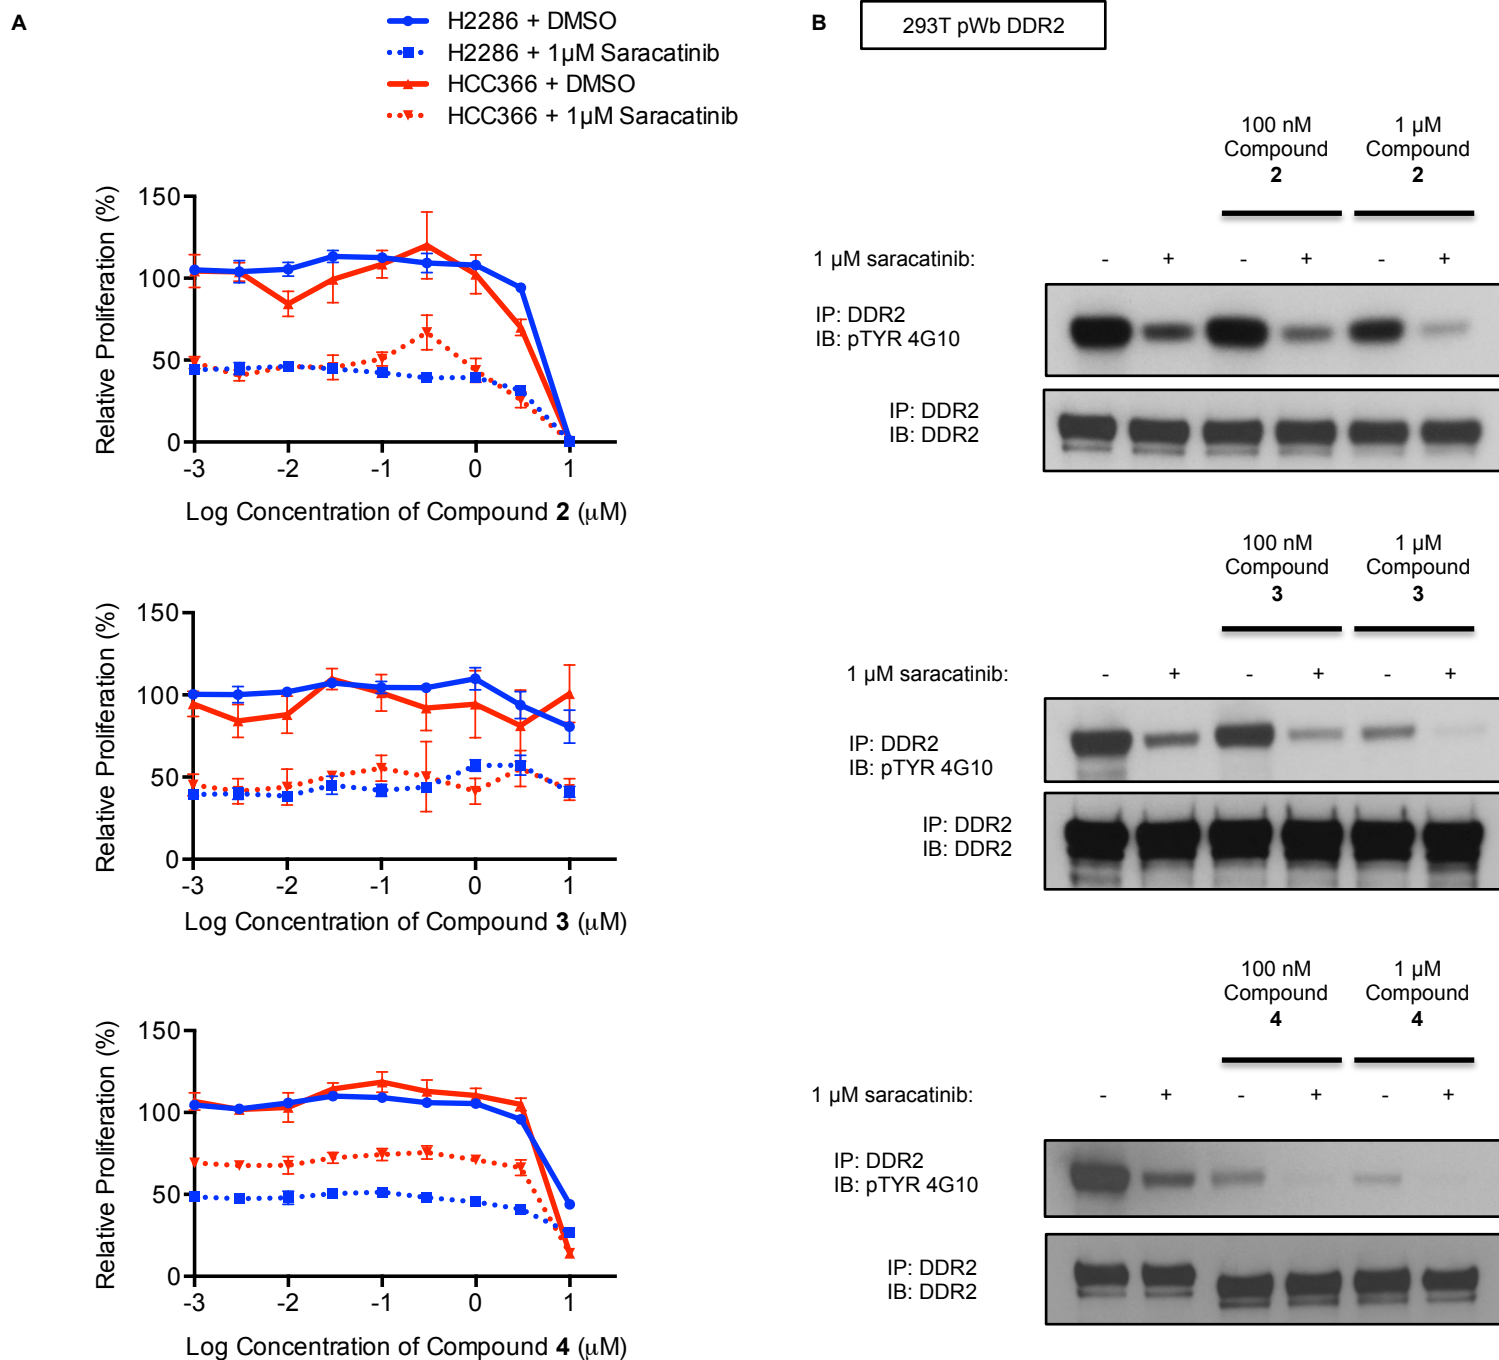

**A**, Proliferation of NCI-H2286 and HCC-366 cells grown for 5 days in the presence of each selective DDR2 inhibitor in combination with or without 1  $\mu$ M of saracatinib. Error bars represent mean  $\pm$  SD.

**B**, DDR2 was ectopically expressed in 293T cells with and phosphorylation was measured by Western blotting with anti-phosphotyrosine (4G10) after immunoprecipitation with an anti-DDR2 antibody. Cells were treated with the indicated concentration of 2, 3 or 4 in combination with or without 1  $\mu$ M of saracatinib.

**Supplementary Figure 4. SFK phosphorylation is suppressed by dual DDR2/SRC inhibitors and not selective DDR2 inhibitors.**

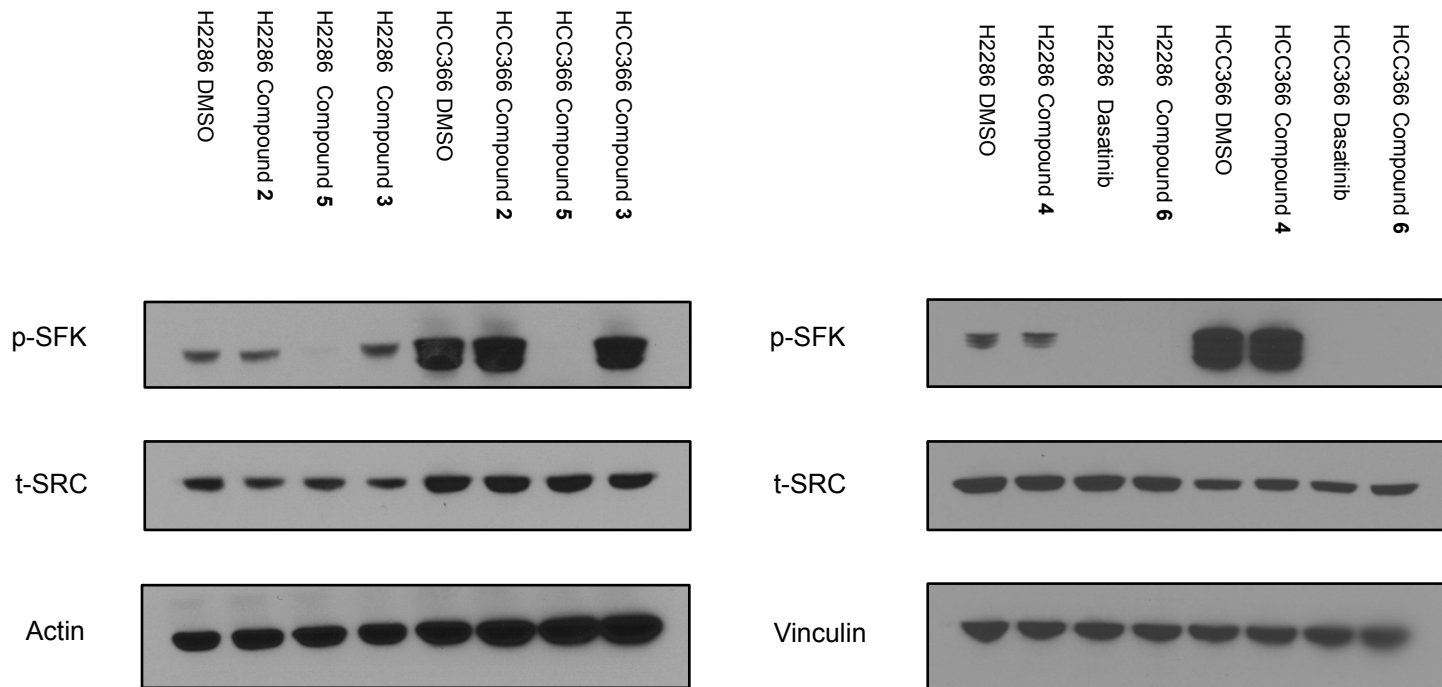

Western blotting was performed with lysates from NCI-H2286 and HCC-366. Cells were treated for 3 hrs with 0.5  $\mu$ M of each drug.

**Supplementary Figure 5. Dual DDR2/SRC inhibitors inhibit both DDR2 and SFK phosphorylation as well as proliferation of *DDR2* mutated cell lines.**

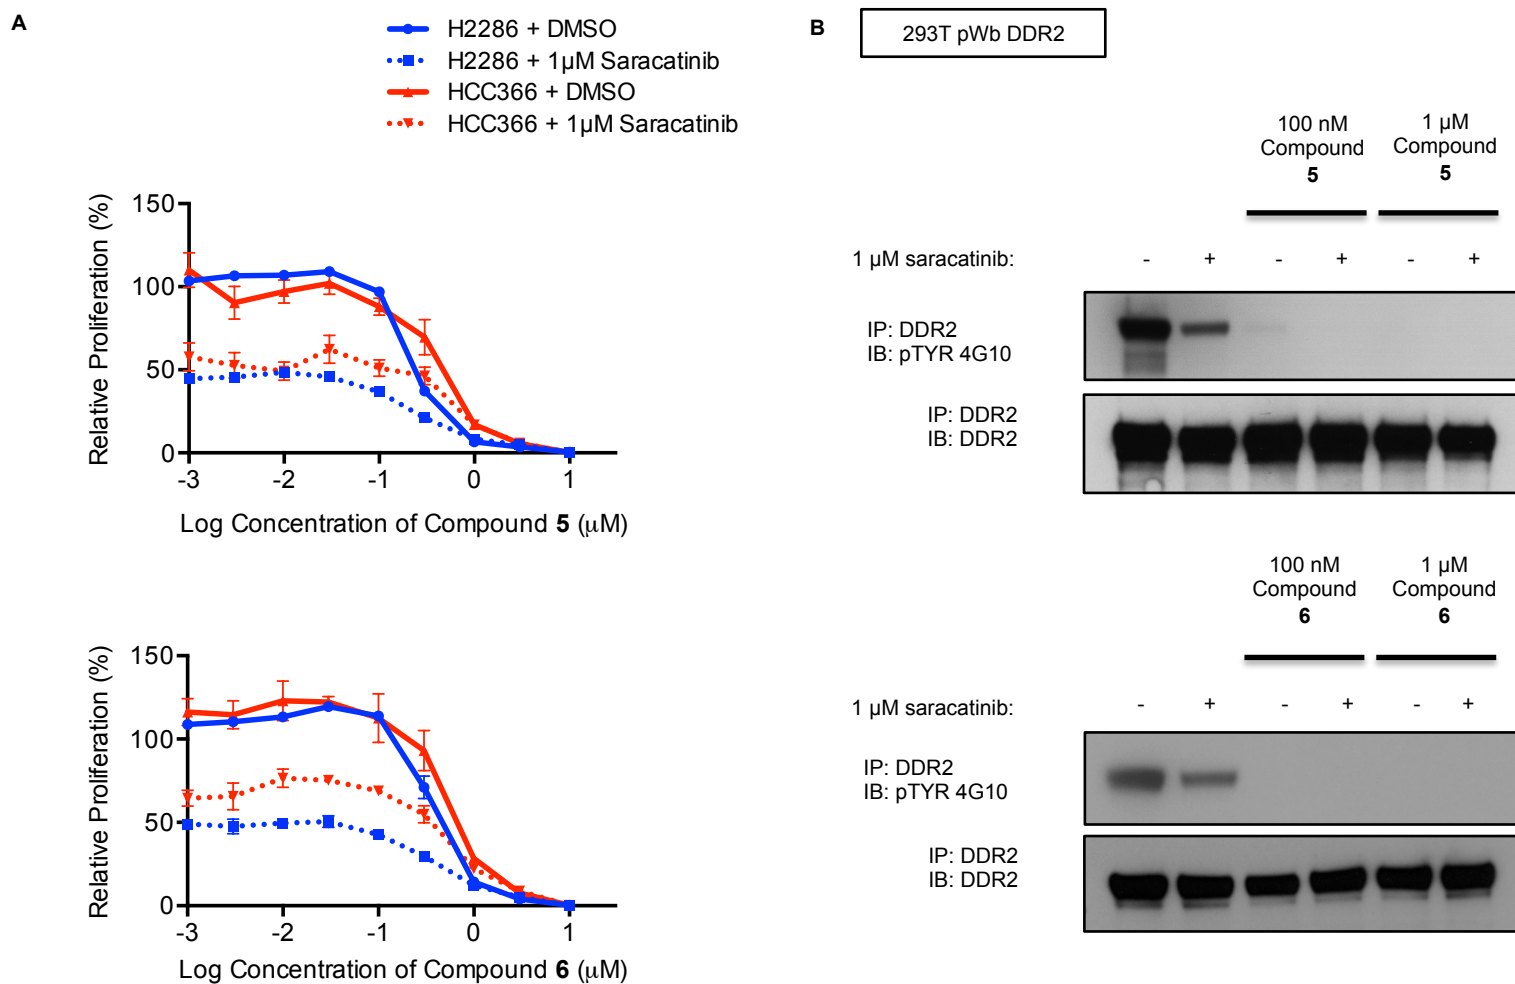

**A**, Proliferation of NCI-H2286 and HCC-366 cells grown for 5 days in the presence of each DDR2/SRC dual inhibitor in combination with or without 1 μM of saracatinib. Error bars represent mean  $\pm$  SD.

**B**, Phosphorylation of DDR2 was measured by Western blotting with anti-phosphotyrosine after immunoprecipitation with an anti-DDR2 antibody. Cells were treated with the indicated concentration of compounds **5** or **6** in combination with or without 1 μM of saracatinib.

**Supplementary Figure 6. DDR2 mutated cell lines are rescued from saracatinib treatment by SRC gatekeeper mutation.**

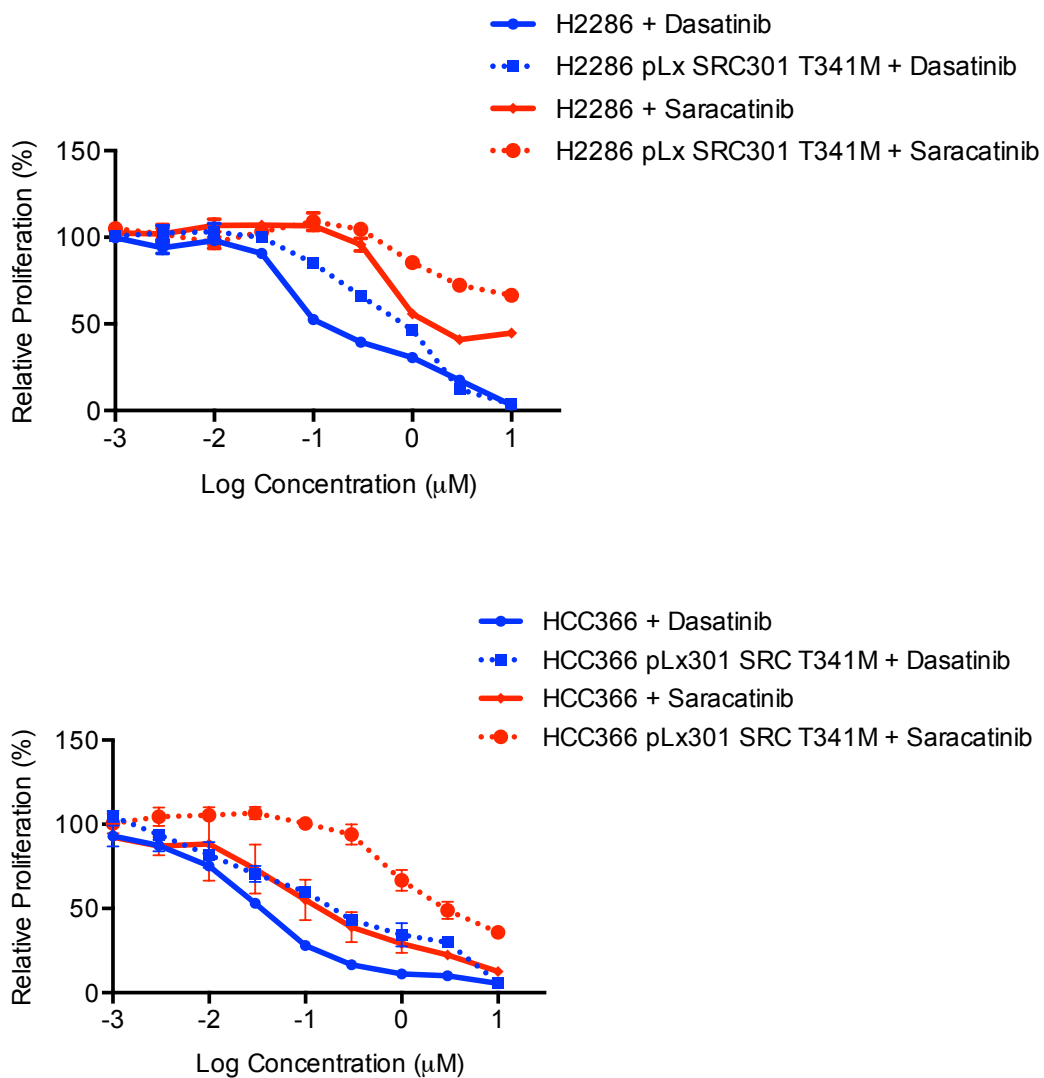

Cell proliferation assay was performed with ectopically expressed SRC GK mutation in lung cancer cell lines and compared to parental cell lines. Error bars represent mean ± SD.

**Supplementary Figure 7. shRNA depletion of DDR2 strongly inhibits DDR2 expression, cell proliferation and moderately inhibits SRC kinase activity.**

**A**

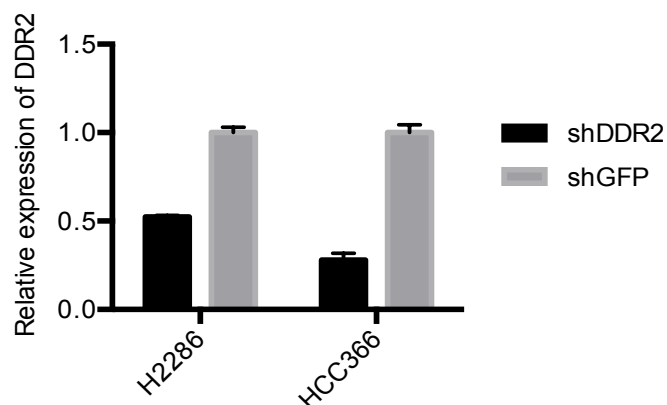

**B**

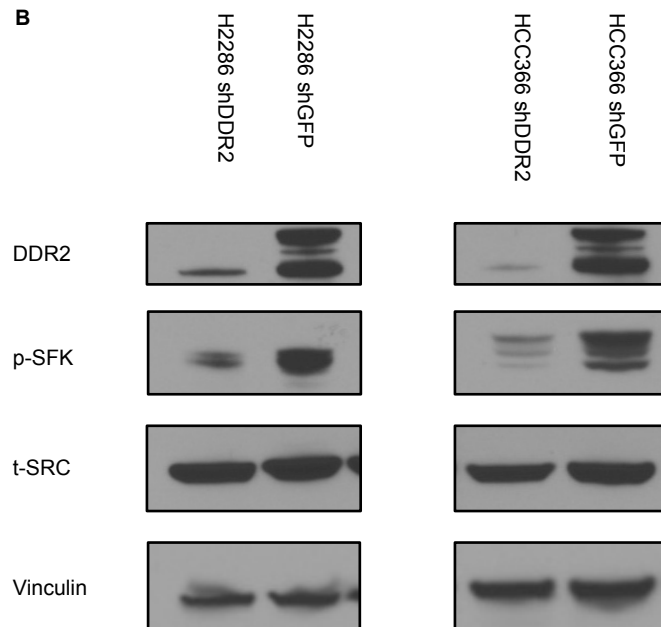

**C**

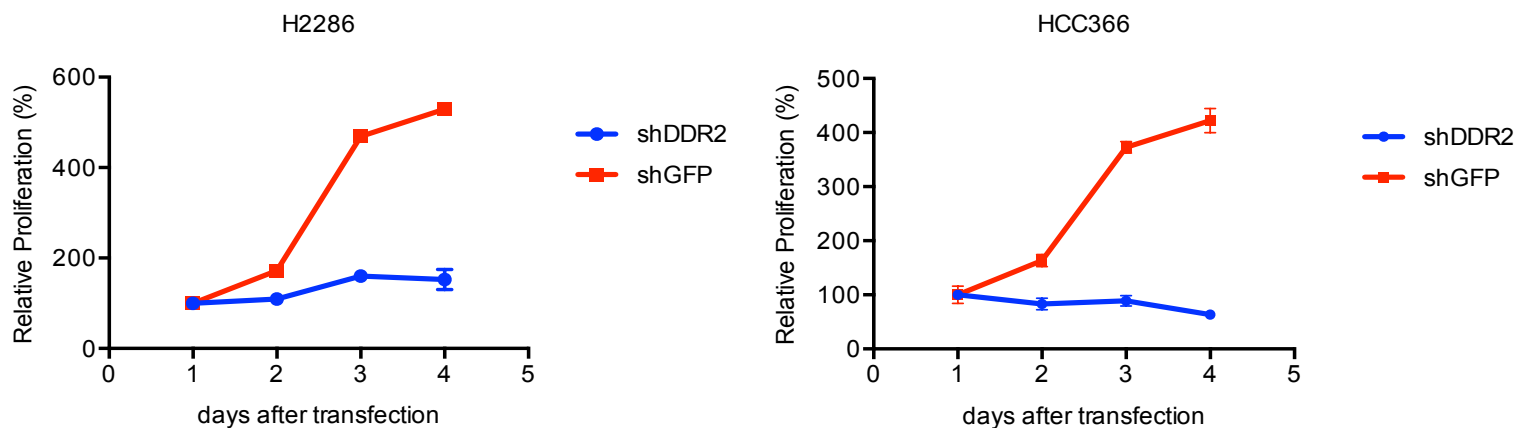

**A**, Cell proliferation was measured after transfected with shRNA for DDR2 with NCI-H2286 and HCC-366 cells. shRNA for GFP was used as a control. All data were normalized to the value of day 1 respectively. Error bars represent mean  $\pm$  SD. **B**, Western blotting was performed with the lysates of shRNA for DDR2 or GFP transfected cells.

**Supplementary Figure 8. Biochemical SRC inhibition or RNAi-mediated depletion decreases proliferation of *DDR2* mutated lines which is potentiated *DDR2* inhibition**

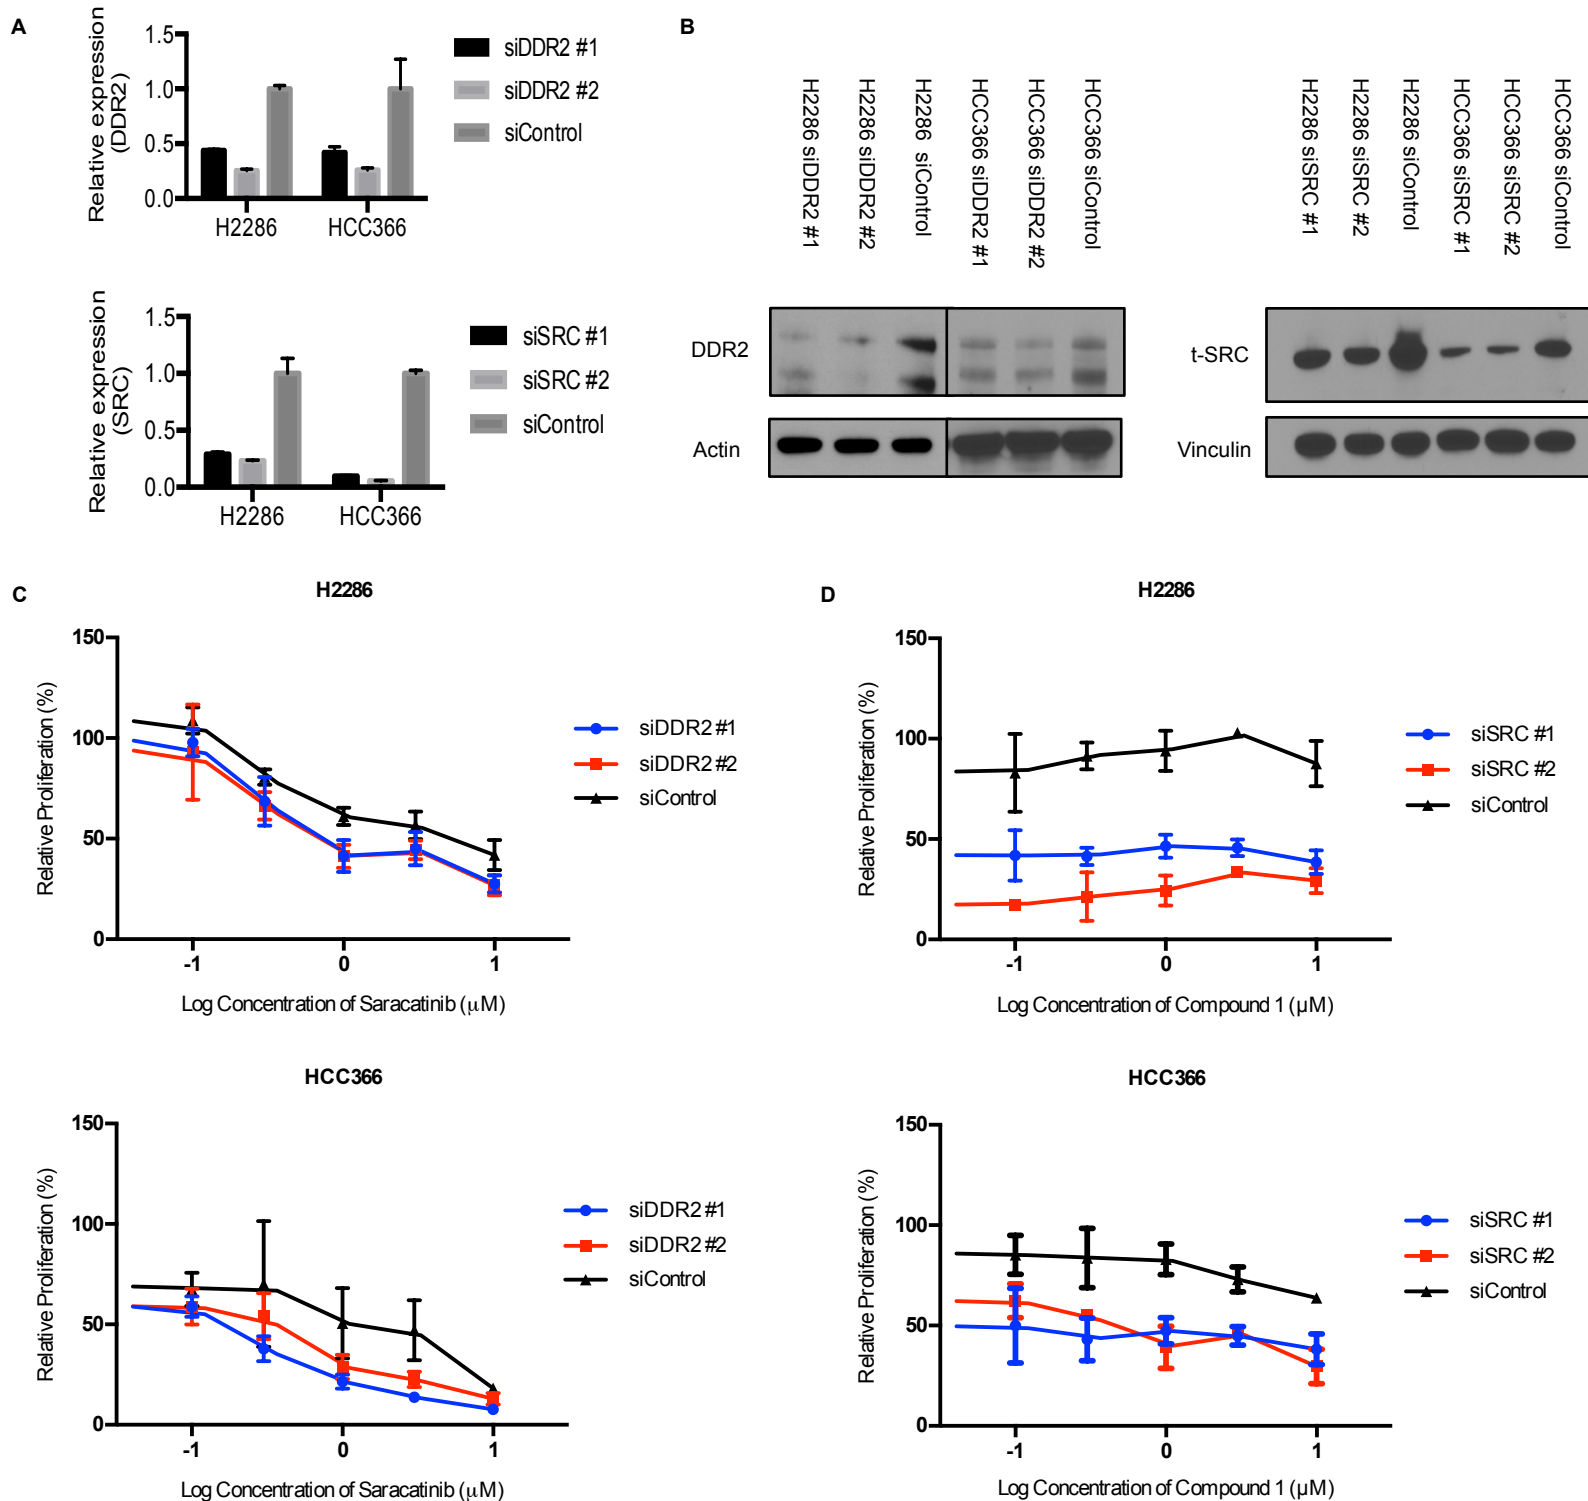

**A**, Expression level of *DDR2* and *SRC* following siRNA treatment measured by real-time PCR. **B**, Protein levels of *SRC* and *DDR2* following siRNA depletion. **C**, **D**, Proliferation of NCI-H2286 and HCC-366 cells transfected with siRNA against *DDR2* or the control siRNA in combination with saracatinib treatment (**C**). Proliferation of NCI-H2286 cells and HCC-366 cells transfected with siRNA against *SRC* or with the control siRNA in combination with treatment of compound **1** (**D**). All data were normalized to untreated control siRNA transfected cells. Graph shows mean  $\pm$  S.D. from a single experiment representative of three independent experiments with 3 replicates per treatment per experiment.

## Supplementary Figure 9. Expression of wild-type or kinase dead DDR2 stabilizes p-SRC.

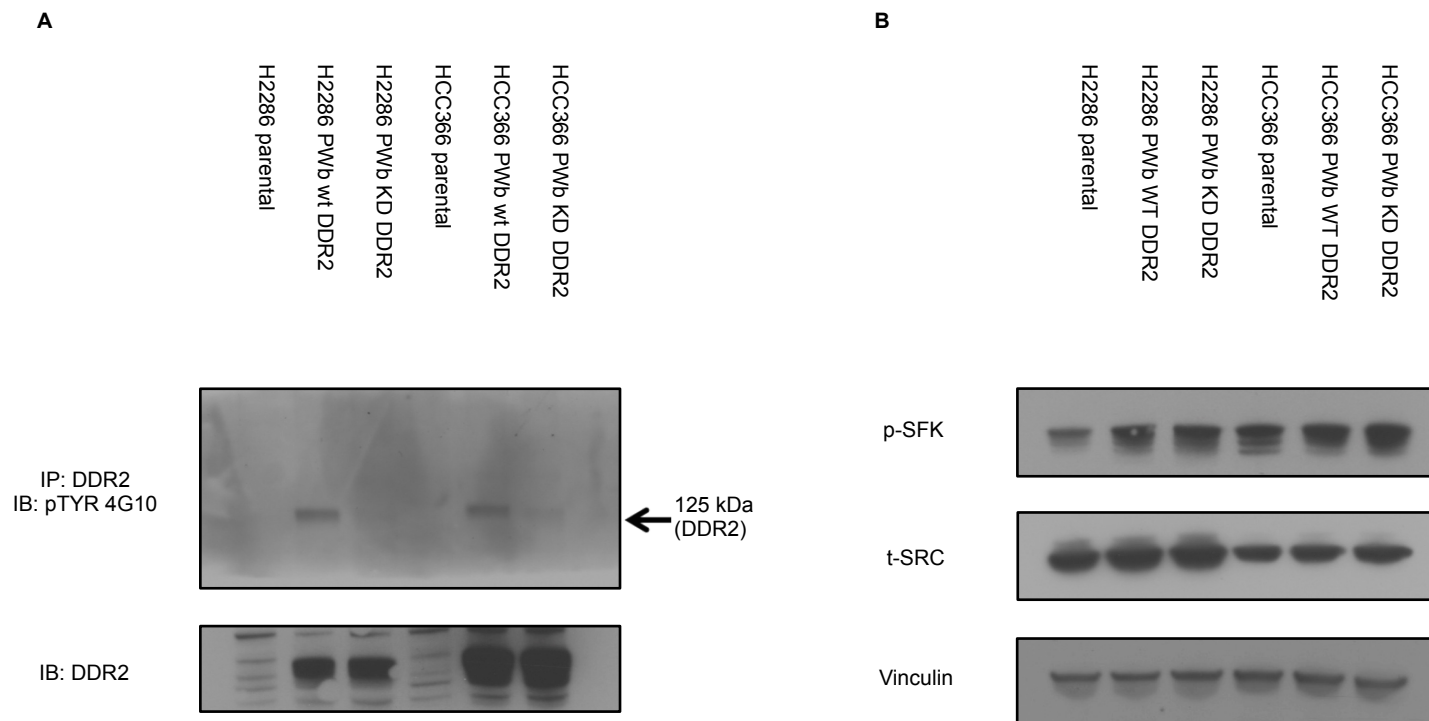

**A,B** Western blotting for anti-phosphotyrosine after immunoprecipitation for anti-DDR2 with cell lysates of NCI-H2286 or HCC-366 cells. These cells ectopically expressed DDR2 WT or DDR2 KD. Western blotting for anti-DDR2, anti-t-SRC, anti-p-SFK and anti-actin were performed with same lysate.

**Supplementary Table 1. KinomeScan™ kinase selectivity profiles for compound 1-6.**

Compound **1-6** were profiled at a concentration of 1  $\mu$ M against a diverse panel of more than 450 kinases by DiscoverX. Table shows the subset of kinases that exhibited a score of 10 or below (score is percent relative to DMSO control, smaller numbers indicate stronger binding).

**A) KinomeScan profiling data of 1**

| Kinases     | Percent<br>Control<br>at 1 uM |
|-------------|-------------------------------|
| AAK1        | No Hit                        |
| ABL1        | No Hit                        |
| ABL1(E255K) | No Hit                        |
| ABL1(F317I) | 13                            |
| ABL1(F317L) | 22                            |
| ABL1(H396P) | No Hit                        |
| ABL1(M351T) | 27                            |
| ABL1(Q252H) | No Hit                        |
| ABL1(T315I) | No Hit                        |
| ABL1(Y253F) | No Hit                        |
| ABL2        | 21                            |
| ACVR1       | No Hit                        |
| ACVR1B      | No Hit                        |
| ACVR2A      | No Hit                        |
| ACVR2B      | No Hit                        |
| ACVRL1      | No Hit                        |
| ADCK3       | No Hit                        |
| ADCK4       | No Hit                        |
| AKT1        | No Hit                        |
| AKT2        | No Hit                        |
| AKT3        | No Hit                        |
| ALK         | No Hit                        |
| AMPK-alpha1 | No Hit                        |
| AMPK-alpha2 | No Hit                        |
| ANKK1       | No Hit                        |
| ARK5        | No Hit                        |
| AURKA       | No Hit                        |
| AURKB       | No Hit                        |
| AURKC       | No Hit                        |
| AXL         | No Hit                        |
| BIKE        | No Hit                        |
| BLK         | No Hit                        |
| BMPR1A      | No Hit                        |
| BMPR1B      | No Hit                        |

|             |        |
|-------------|--------|
| BMPR2       | No Hit |
| BMX         | No Hit |
| BRAF        | 2      |
| BRAF(V600E) | 0.15   |
| BRSK1       | No Hit |
| BRSK2       | No Hit |
| BTK         | No Hit |
| CAMK1       | No Hit |
| CAMK1D      | No Hit |
| CAMK1G      | No Hit |
| CAMK2A      | No Hit |
| CAMK2B      | No Hit |
| CAMK2D      | No Hit |
| CAMK2G      | No Hit |
| CAMK4       | No Hit |
| CAMKK1      | No Hit |
| CAMKK2      | No Hit |
| CDC2L1      | No Hit |
| CDC2L2      | No Hit |
| CDK11       | 25     |
| CDK2        | No Hit |
| CDK3        | No Hit |
| CDK5        | No Hit |
| CDK7        | No Hit |
| CDK8        | No Hit |
| CDK9        | No Hit |
| CDKL2       | No Hit |
| CHEK1       | No Hit |
| CHEK2       | No Hit |
| CIT         | No Hit |
| CLK1        | No Hit |
| CLK2        | No Hit |
| CLK3        | No Hit |
| CLK4        | No Hit |
| CSF1R       | 1.4    |
| CSK         | No Hit |
| CSNK1A1L    | No Hit |
| CSNK1D      | No Hit |
| CSNK1E      | No Hit |
| CSNK1G1     | No Hit |
| CSNK1G2     | No Hit |
| CSNK1G3     | No Hit |
| CSNK2A1     | No Hit |
| CSNK2A2     | No Hit |
| DAPK1       | No Hit |
| DAPK2       | No Hit |
| DAPK3       | No Hit |
| DCAMKL1     | No Hit |
| DCAMKL2     | No Hit |

|                              |        |
|------------------------------|--------|
| DCAMKL3                      | No Hit |
| DDR1                         | 0.1    |
| DDR2                         | 0      |
| DLK                          | No Hit |
| DMPK                         | No Hit |
| DMPK2                        | No Hit |
| DRAK1                        | No Hit |
| DRAK2                        | No Hit |
| DYRK1B                       | No Hit |
| EGFR                         | No Hit |
| EGFR(E746-A750del)           | No Hit |
| EGFR(G719C)                  | No Hit |
| EGFR(G719S)                  | No Hit |
| EGFR(L747-E749del,<br>A750P) | No Hit |
| EGFR(L747-S752del,<br>P753S) | No Hit |
| EGFR(L747-T751del,Sins)      | No Hit |
| EGFR(L858R)                  | No Hit |
| EGFR(L861Q)                  | No Hit |
| EGFR(S752-I759del)           | No Hit |
| EPHA1                        | No Hit |
| EPHA2                        | 2.2    |
| EPHA3                        | 8.8    |
| EPHA4                        | 6.8    |
| EPHA5                        | 1.1    |
| EPHA6                        | No Hit |
| EPHA7                        | No Hit |
| EPHA8                        | 0.35   |
| EPHB1                        | 1.8    |
| EPHB2                        | 1.6    |
| EPHB3                        | 3.3    |
| EPHB4                        | 6.9    |
| ERBB2                        | No Hit |
| ERBB4                        | No Hit |
| ERK1                         | No Hit |
| ERK2                         | No Hit |
| ERK3                         | No Hit |
| ERK4                         | No Hit |
| ERK5                         | No Hit |
| ERK8                         | No Hit |
| FER                          | No Hit |
| FES                          | No Hit |
| FGFR1                        | No Hit |
| FGFR2                        | No Hit |
| FGFR3                        | No Hit |
| FGFR3(G697C)                 | No Hit |
| FGFR4                        | No Hit |
| FGR                          | No Hit |

|                       |        |
|-----------------------|--------|
| FLT1                  | 33     |
| FLT3                  | No Hit |
| FLT3(D835H)           | No Hit |
| FLT3(D835Y)           | No Hit |
| FLT3(ITD)             | No Hit |
| FLT3(K663Q)           | No Hit |
| FLT3(N841I)           | No Hit |
| FLT4                  | No Hit |
| FRK                   | 1.3    |
| FYN                   | No Hit |
| GAK                   | No Hit |
| GCN2(Kin.Dom.2,S808G) | No Hit |
| GSK3A                 | No Hit |
| GSK3B                 | No Hit |
| HCK                   | No Hit |
| HIPK1                 | No Hit |
| IGF1R                 | No Hit |
| IKK-alpha             | No Hit |
| IKK-beta              | No Hit |
| IKK-epsilon           | No Hit |
| INSR                  | No Hit |
| INSRR                 | No Hit |
| IRAK3                 | No Hit |
| ITK                   | No Hit |
| JAK1(Kin.Dom.1)       | No Hit |
| JAK1(Kin.Dom.2)       | No Hit |
| JAK2(Kin.Dom.2)       | No Hit |
| JAK3(Kin.Dom.2)       | No Hit |
| JNK1                  | No Hit |
| JNK2                  | No Hit |
| JNK3                  | No Hit |
| KIT                   | 0      |
| KIT(D816V)            | No Hit |
| KIT(V559D)            | 0      |
| KIT(V559D,T670I)      | No Hit |
| KIT(V559D,V654A)      | 18     |
| LATS1                 | No Hit |
| LATS2                 | No Hit |
| LCK                   | 1.9    |
| LIMK1                 | No Hit |
| LIMK2                 | No Hit |
| LKB1                  | No Hit |
| LOK                   | No Hit |
| LTK                   | No Hit |
| LYN                   | 9.4    |
| MAP3K3                | No Hit |
| MAP3K4                | No Hit |
| MAP3K5                | No Hit |
| MAP4K1                | No Hit |

|           |        |
|-----------|--------|
| MAP4K2    | No Hit |
| MAP4K3    | No Hit |
| MAP4K4    | No Hit |
| MAP4K5    | No Hit |
| MAPKAPK2  | No Hit |
| MAPKAPK5  | No Hit |
| MARK1     | No Hit |
| MARK2     | No Hit |
| MARK3     | No Hit |
| MARK4     | No Hit |
| MEK1      | No Hit |
| MEK2      | No Hit |
| MEK3      | No Hit |
| MEK4      | No Hit |
| MEK6      | No Hit |
| MELK      | No Hit |
| MERTK     | No Hit |
| MET       | No Hit |
| MINK      | No Hit |
| MKNK1     | No Hit |
| MKNK2     | No Hit |
| MLCK      | No Hit |
| MLK1      | No Hit |
| MLK2      | No Hit |
| MLK3      | No Hit |
| MRCKA     | No Hit |
| MRCKB     | No Hit |
| MST1      | No Hit |
| MST1R     | No Hit |
| MST2      | No Hit |
| MST3      | No Hit |
| MST4      | No Hit |
| MUSK      | No Hit |
| MYLK      | No Hit |
| MYLK2     | No Hit |
| MYO3A     | No Hit |
| MYO3B     | No Hit |
| NDR2      | No Hit |
| NEK1      | No Hit |
| NEK2      | No Hit |
| NEK5      | No Hit |
| NEK6      | No Hit |
| NEK7      | No Hit |
| NEK9      | No Hit |
| NLK       | No Hit |
| p38-alpha | 5      |
| p38-beta  | No Hit |
| p38-delta | No Hit |
| p38-gamma | No Hit |

|               |        |
|---------------|--------|
| PAK1          | No Hit |
| PAK2          | No Hit |
| PAK3          | No Hit |
| PAK4          | No Hit |
| PAK6          | No Hit |
| PAK7/PAK5     | No Hit |
| PCTK1         | No Hit |
| PCTK2         | No Hit |
| PCTK3         | No Hit |
| PDGFRA        | 0.2    |
| PDGFRB        | 0.05   |
| PDPK1         | No Hit |
| PFTAIRES2     | No Hit |
| PFTK1         | No Hit |
| PHKG1         | No Hit |
| PHKG2         | No Hit |
| PIK3C2B       | No Hit |
| PIK3CA        | No Hit |
| PIK3CA(E545K) | No Hit |
| PIK3CB        | No Hit |
| PIK3CD        | No Hit |
| PIK3CG        | No Hit |
| PIM1          | No Hit |
| PIM2          | No Hit |
| PIM3          | No Hit |
| PIP5K1A       | No Hit |
| PIP5K2B       | No Hit |
| PKAC-alpha    | No Hit |
| PKAC-beta     | No Hit |
| PKMYT1        | No Hit |
| PKN1          | No Hit |
| PKN2          | No Hit |
| PLK1          | No Hit |
| PLK3          | No Hit |
| PLK4          | No Hit |
| PRKCD         | No Hit |
| PRKCE         | No Hit |
| PRKCH         | No Hit |
| PRKCQ         | No Hit |
| PRKD1         | No Hit |
| PRKD2         | No Hit |
| PRKD3         | No Hit |
| PRKG1         | No Hit |
| PRKG2         | No Hit |
| PRKR          | No Hit |
| PRKX          | No Hit |
| PTK2          | No Hit |
| PTK2B         | No Hit |
| PTK6          | No Hit |

|                    |        |
|--------------------|--------|
| RAF1               | 4.5    |
| RET                | No Hit |
| RET(M918T)         | No Hit |
| RET(V804L)         | No Hit |
| RET(V804M)         | No Hit |
| RIOK1              | No Hit |
| RIOK2              | No Hit |
| RIOK3              | No Hit |
| RIPK1              | No Hit |
| RIPK2              | No Hit |
| RIPK4              | No Hit |
| ROCK2              | No Hit |
| ROS1               | No Hit |
| RPS6KA1(Kin.Dom.1) | No Hit |
| RPS6KA1(Kin.Dom.2) | No Hit |
| RPS6KA2(Kin.Dom.1) | No Hit |
| RPS6KA2(Kin.Dom.2) | No Hit |
| RPS6KA3(Kin.Dom.1) | No Hit |
| RPS6KA4(Kin.Dom.1) | No Hit |
| RPS6KA4(Kin.Dom.2) | No Hit |
| RPS6KA5(Kin.Dom.1) | No Hit |
| RPS6KA5(Kin.Dom.2) | No Hit |
| RPS6KA6(Kin.Dom.1) | No Hit |
| RPS6KA6(Kin.Dom.2) | No Hit |
| SgK085             | No Hit |
| SgK110             | No Hit |
| SLK                | No Hit |
| SNARK              | No Hit |
| SNF1LK             | No Hit |
| SNF1LK2            | No Hit |
| SRC                | No Hit |
| SRMS               | No Hit |
| SRPK1              | No Hit |
| SRPK2              | No Hit |
| SRPK3              | No Hit |
| STK16              | No Hit |
| STK33              | No Hit |
| STK35              | No Hit |
| STK36              | No Hit |
| SYK                | No Hit |
| TAK1               | No Hit |
| TAOK1              | No Hit |
| TAOK3              | No Hit |
| TEC                | No Hit |
| TESK1              | No Hit |
| TGFBR1             | No Hit |
| TGFBR2             | No Hit |
| TIE1               | No Hit |
| TIE2               | No Hit |

|                 |        |
|-----------------|--------|
| TLK1            | No Hit |
| TLK2            | No Hit |
| TNIK            | No Hit |
| TNK1            | No Hit |
| TNK2            | No Hit |
| TNNI3K          | 12     |
| TRKA            | No Hit |
| TRKB            | 32     |
| TRKC            | 15     |
| TSSK1           | No Hit |
| TTK             | No Hit |
| TXK             | No Hit |
| TYK2(Kin.Dom.1) | No Hit |
| TYK2(Kin.Dom.2) | No Hit |
| TYRO3           | No Hit |
| ULK1            | No Hit |
| ULK2            | No Hit |
| ULK3            | No Hit |
| VEGFR2          | No Hit |
| WEE1            | No Hit |
| WEE2            | No Hit |
| YANK2           | No Hit |
| YANK3           | No Hit |
| YES             | No Hit |
| YSK1            | No Hit |
| ZAK             | 6.9    |
| ZAP70           | No Hit |

## B) KinomeScan profiling data of 2.

| Kinases                       | Percent<br>Control<br>at 1 uM |
|-------------------------------|-------------------------------|
| AAK1                          | 97                            |
| ABL1(E255K)-phosphorylated    | 88                            |
| ABL1(F317I)-nonphosphorylated | 5.9                           |
| ABL1(F317I)-phosphorylated    | 54                            |
| ABL1(F317L)-nonphosphorylated | 21                            |
| ABL1(F317L)-phosphorylated    | 16                            |
| ABL1(H396P)-nonphosphorylated | 26                            |
| ABL1(H396P)-phosphorylated    | 90                            |
| ABL1(M351T)-phosphorylated    | 65                            |
| ABL1(Q252H)-nonphosphorylated | 6.5                           |
| ABL1(Q252H)-phosphorylated    | 100                           |
| ABL1(T315I)-nonphosphorylated | 100                           |
| ABL1(T315I)-phosphorylated    | 93                            |
| ABL1(Y253F)-phosphorylated    | 72                            |

|                        |     |
|------------------------|-----|
| ABL1-nonphosphorylated | 1.1 |
| ABL1-phosphorylated    | 43  |
| ABL2                   | 47  |
| ACVR1                  | 91  |
| ACVR1B                 | 81  |
| ACVR2A                 | 100 |
| ACVR2B                 | 69  |
| ACVRL1                 | 99  |
| ADCK3                  | 85  |
| ADCK4                  | 93  |
| AKT1                   | 100 |
| AKT2                   | 89  |
| AKT3                   | 86  |
| ALK                    | 100 |
| ALK(C1156Y)            | 100 |
| ALK(L1196M)            | 100 |
| AMPK-alpha1            | 92  |
| AMPK-alpha2            | 100 |
| ANKK1                  | 100 |
| ARK5                   | 100 |
| ASK1                   | 98  |
| ASK2                   | 100 |
| AURKA                  | 98  |
| AURKB                  | 100 |
| AURKC                  | 87  |
| AXL                    | 89  |
| BIKE                   | 85  |
| BLK                    | 60  |
| BMPR1A                 | 86  |
| BMPR1B                 | 100 |
| BMPR2                  | 100 |
| BMX                    | 93  |
| BRAF                   | 60  |
| BRAF(V600E)            | 23  |
| BRK                    | 94  |
| BRSK1                  | 88  |
| BRSK2                  | 84  |
| BTK                    | 100 |
| BUB1                   | 95  |
| CAMK1                  | 79  |
| CAMK1B                 | 97  |
| CAMK1D                 | 83  |
| CAMK1G                 | 95  |
| CAMK2A                 | 100 |
| CAMK2B                 | 95  |
| CAMK2D                 | 96  |
| CAMK2G                 | 100 |
| CAMK4                  | 84  |
| CAMKK1                 | 74  |

|                     |      |
|---------------------|------|
| CAMKK2              | 94   |
| CASK                | 90   |
| CDC2L1              | 100  |
| CDC2L2              | 100  |
| CDC2L5              | 100  |
| CDK11               | 91   |
| CDK2                | 99   |
| CDK3                | 92   |
| CDK4                | 100  |
| CDK4-cyclinD1       | 100  |
| CDK4-cyclinD3       | 100  |
| CDK5                | 100  |
| CDK7                | 96   |
| CDK8                | 78   |
| CDK9                | 100  |
| CDKL1               | 49   |
| CDKL2               | 68   |
| CDKL3               | 86   |
| CDKL5               | 99   |
| CHEK1               | 100  |
| CHEK2               | 82   |
| CIT                 | 43   |
| CLK1                | 100  |
| CLK2                | 91   |
| CLK3                | 96   |
| CLK4                | 82   |
| CSF1R               | 0.95 |
| CSF1R-autoinhibited | 100  |
| CSK                 | 85   |
| CSNK1A1             | 100  |
| CSNK1A1L            | 99   |
| CSNK1D              | 100  |
| CSNK1E              | 99   |
| CSNK1G1             | 93   |
| CSNK1G2             | 100  |
| CSNK1G3             | 92   |
| CSNK2A1             | 100  |
| CSNK2A2             | 100  |
| CTK                 | 90   |
| DAPK1               | 98   |
| DAPK2               | 95   |
| DAPK3               | 73   |
| DCAMKL1             | 87   |
| DCAMKL2             | 100  |
| DCAMKL3             | 82   |
| DDR1                | 0.1  |
| DDR2                | 1.5  |
| DLK                 | 88   |
| DMPK                | 96   |

|                           |     |
|---------------------------|-----|
| DMPK2                     | 100 |
| DRAK1                     | 100 |
| DRAK2                     | 100 |
| DYRK1A                    | 100 |
| DYRK1B                    | 97  |
| DYRK2                     | 93  |
| EGFR                      | 87  |
| EGFR(E746-A750del)        | 97  |
| EGFR(G719C)               | 90  |
| EGFR(G719S)               | 89  |
| EGFR(L747-E749del, A750P) | 88  |
| EGFR(L747-S752del, P753S) | 100 |
| EGFR(L747-T751del,Sins)   | 80  |
| EGFR(L858R)               | 100 |
| EGFR(L858R,T790M)         | 76  |
| EGFR(L861Q)               | 71  |
| EGFR(S752-I759del)        | 76  |
| EGFR(T790M)               | 100 |
| EIF2AK1                   | 100 |
| EPHA1                     | 96  |
| EPHA2                     | 96  |
| EPHA3                     | 95  |
| EPHA4                     | 100 |
| EPHA5                     | 91  |
| EPHA6                     | 100 |
| EPHA7                     | 100 |
| EPHA8                     | 92  |
| EPHB1                     | 95  |
| EPHB2                     | 91  |
| EPHB3                     | 100 |
| EPHB4                     | 98  |
| EPHB6                     | 100 |
| ERBB2                     | 100 |
| ERBB3                     | 87  |
| ERBB4                     | 100 |
| ERK1                      | 100 |
| ERK2                      | 91  |
| ERK3                      | 97  |
| ERK4                      | 94  |
| ERK5                      | 100 |
| ERK8                      | 85  |
| ERN1                      | 82  |
| FAK                       | 96  |
| FER                       | 100 |
| FES                       | 100 |
| FGFR1                     | 82  |
| FGFR2                     | 99  |
| FGFR3                     | 98  |
| FGFR3(G697C)              | 89  |

|                              |     |
|------------------------------|-----|
| FGFR4                        | 96  |
| FGR                          | 87  |
| FLT1                         | 57  |
| FLT3                         | 63  |
| FLT3(D835H)                  | 85  |
| FLT3(D835V)                  | 99  |
| FLT3(D835Y)                  | 84  |
| FLT3(ITD)                    | 93  |
| FLT3(ITD,D835V)              | 93  |
| FLT3(ITD,F691L)              | 70  |
| FLT3(K663Q)                  | 86  |
| FLT3(N841I)                  | 84  |
| FLT3(R834Q)                  | 88  |
| FLT3-autoinhibited           | 100 |
| FLT4                         | 44  |
| FRK                          | 60  |
| FYN                          | 96  |
| GAK                          | 99  |
| GCN2(Kin.Dom.2,S808G)        | 100 |
| GRK1                         | 88  |
| GRK2                         | 100 |
| GRK3                         | 97  |
| GRK4                         | 91  |
| GRK7                         | 100 |
| GSK3A                        | 100 |
| GSK3B                        | 92  |
| HASPIN                       | 100 |
| HCK                          | 84  |
| HIPK1                        | 53  |
| HIPK2                        | 100 |
| HIPK3                        | 100 |
| HIPK4                        | 83  |
| HPK1                         | 100 |
| HUNK                         | 74  |
| ICK                          | 100 |
| IGF1R                        | 100 |
| IKK-alpha                    | 100 |
| IKK-beta                     | 83  |
| IKK-epsilon                  | 100 |
| INSR                         | 99  |
| INSRR                        | 93  |
| IRAK1                        | 100 |
| IRAK3                        | 95  |
| IRAK4                        | 99  |
| ITK                          | 100 |
| JAK1(JH1domain-catalytic)    | 97  |
| JAK1(JH2domain-pseudokinase) | 68  |
| JAK2(JH1domain-catalytic)    | 100 |
| JAK3(JH1domain-catalytic)    | 100 |

|                   |      |
|-------------------|------|
| JNK1              | 92   |
| JNK2              | 60   |
| JNK3              | 89   |
| KIT               | 2.1  |
| KIT(A829P)        | 100  |
| KIT(D816H)        | 93   |
| KIT(D816V)        | 92   |
| KIT(L576P)        | 0.65 |
| KIT(V559D)        | 0.75 |
| KIT(V559D,T670I)  | 54   |
| KIT(V559D,V654A)  | 12   |
| KIT-autoinhibited | 90   |
| LATS1             | 100  |
| LATS2             | 100  |
| LCK               | 60   |
| LIMK1             | 83   |
| LIMK2             | 97   |
| LKB1              | 90   |
| LOK               | 4.2  |
| LRRK2             | 100  |
| LRRK2(G2019S)     | 68   |
| LTK               | 90   |
| LYN               | 43   |
| LZK               | 73   |
| MAK               | 88   |
| MAP3K1            | 99   |
| MAP3K15           | 100  |
| MAP3K2            | 99   |
| MAP3K3            | 81   |
| MAP3K4            | 100  |
| MAP4K2            | 100  |
| MAP4K3            | 87   |
| MAP4K4            | 64   |
| MAP4K5            | 100  |
| MAPKAPK2          | 91   |
| MAPKAPK5          | 100  |
| MARK1             | 87   |
| MARK2             | 99   |
| MARK3             | 100  |
| MARK4             | 87   |
| MAST1             | 100  |
| MEK1              | 100  |
| MEK2              | 93   |
| MEK3              | 100  |
| MEK4              | 100  |
| MEK5              | 100  |
| MEK6              | 100  |
| MELK              | 100  |
| MERTK             | 100  |

|             |      |
|-------------|------|
| MET         | 100  |
| MET(M1250T) | 88   |
| MET(Y1235D) | 95   |
| MINK        | 94   |
| MKK7        | 99   |
| MKNK1       | 100  |
| MKNK2       | 95   |
| MLCK        | 95   |
| MLK1        | 94   |
| MLK2        | 68   |
| MLK3        | 100  |
| MRCKA       | 98   |
| MRCKB       | 98   |
| MST1        | 91   |
| MST1R       | 100  |
| MST2        | 100  |
| MST3        | 100  |
| MST4        | 100  |
| MTOR        | 100  |
| MUSK        | 90   |
| MYLK        | 100  |
| MYLK2       | 100  |
| MYLK4       | 86   |
| MYO3A       | 89   |
| MYO3B       | 79   |
| NDR1        | 67   |
| NDR2        | 88   |
| NEK1        | 100  |
| NEK10       | 100  |
| NEK11       | 100  |
| NEK2        | 95   |
| NEK3        | 77   |
| NEK4        | 77   |
| NEK5        | 98   |
| NEK6        | 86   |
| NEK7        | 100  |
| NEK9        | 100  |
| NIK         | 78   |
| NIM1        | 100  |
| NLK         | 89   |
| OSR1        | 88   |
| p38-alpha   | 0.45 |
| p38-beta    | 5.5  |
| p38-delta   | 80   |
| p38-gamma   | 76   |
| PAK1        | 77   |
| PAK2        | 67   |
| PAK3        | 39   |
| PAK4        | 78   |

|                       |     |
|-----------------------|-----|
| PAK6                  | 91  |
| PAK7                  | 96  |
| PCTK1                 | 98  |
| PCTK2                 | 100 |
| PCTK3                 | 89  |
| PDGFRA                | 34  |
| PDGFRB                | 1.2 |
| PDPK1                 | 100 |
| PFCDPK1(P.falciparum) | 14  |
| PFPK5(P.falciparum)   | 100 |
| PFTAIRE2              | 100 |
| PFTK1                 | 93  |
| PHKG1                 | 87  |
| PHKG2                 | 81  |
| PIK3C2B               | 98  |
| PIK3C2G               | 100 |
| PIK3CA                | 100 |
| PIK3CA(C420R)         | 100 |
| PIK3CA(E542K)         | 89  |
| PIK3CA(E545A)         | 50  |
| PIK3CA(E545K)         | 61  |
| PIK3CA(H1047L)        | 100 |
| PIK3CA(H1047Y)        | 83  |
| PIK3CA(I800L)         | 67  |
| PIK3CA(M1043I)        | 100 |
| PIK3CA(Q546K)         | 100 |
| PIK3CB                | 100 |
| PIK3CD                | 100 |
| PIK3CG                | 100 |
| PIK4CB                | 100 |
| PIKFYVE               | 84  |
| PIM1                  | 74  |
| PIM2                  | 93  |
| PIM3                  | 84  |
| PIP5K1A               | 89  |
| PIP5K1C               | 100 |
| PIP5K2B               | 89  |
| PIP5K2C               | 100 |
| PKAC-alpha            | 81  |
| PKAC-beta             | 89  |
| PKMYT1                | 78  |
| PKN1                  | 100 |
| PKN2                  | 100 |
| PKNB(M.tuberculosis)  | 79  |
| PLK1                  | 100 |
| PLK2                  | 100 |
| PLK3                  | 79  |
| PLK4                  | 99  |
| PRKCD                 | 80  |

|                               |     |
|-------------------------------|-----|
| PRKCE                         | 83  |
| PRKCH                         | 93  |
| PRKCI                         | 95  |
| PRKCQ                         | 79  |
| PRKD1                         | 87  |
| PRKD2                         | 86  |
| PRKD3                         | 95  |
| PRKG1                         | 94  |
| PRKG2                         | 100 |
| PRKR                          | 74  |
| PRKX                          | 77  |
| PRP4                          | 69  |
| PYK2                          | 75  |
| QSK                           | 89  |
| RAF1                          | 45  |
| RET                           | 13  |
| RET(M918T)                    | 20  |
| RET(V804L)                    | 81  |
| RET(V804M)                    | 37  |
| RIOK1                         | 100 |
| RIOK2                         | 100 |
| RIOK3                         | 89  |
| RIPK1                         | 96  |
| RIPK2                         | 87  |
| RIPK4                         | 100 |
| RIPK5                         | 97  |
| ROCK1                         | 100 |
| ROCK2                         | 46  |
| ROS1                          | 100 |
| RPS6KA4(Kin.Dom.1-N-terminal) | 94  |
| RPS6KA4(Kin.Dom.2-C-terminal) | 100 |
| RPS6KA5(Kin.Dom.1-N-terminal) | 82  |
| RPS6KA5(Kin.Dom.2-C-terminal) | 94  |
| RSK1(Kin.Dom.1-N-terminal)    | 100 |
| RSK1(Kin.Dom.2-C-terminal)    | 96  |
| RSK2(Kin.Dom.1-N-terminal)    | 100 |
| RSK2(Kin.Dom.2-C-terminal)    | 100 |
| RSK3(Kin.Dom.1-N-terminal)    | 84  |
| RSK3(Kin.Dom.2-C-terminal)    | 63  |
| RSK4(Kin.Dom.1-N-terminal)    | 100 |
| RSK4(Kin.Dom.2-C-terminal)    | 89  |
| S6K1                          | 100 |
| SBK1                          | 98  |
| SGK                           | 100 |
| SgK110                        | 79  |
| SGK2                          | 100 |
| SGK3                          | 100 |
| SIK                           | 93  |
| SIK2                          | 77  |

|                              |     |
|------------------------------|-----|
| SLK                          | 85  |
| SNARK                        | 100 |
| SNRK                         | 100 |
| SRC                          | 92  |
| SRMS                         | 89  |
| SRPK1                        | 70  |
| SRPK2                        | 91  |
| SRPK3                        | 73  |
| STK16                        | 96  |
| STK33                        | 94  |
| STK35                        | 92  |
| STK36                        | 89  |
| STK39                        | 100 |
| SYK                          | 73  |
| TAK1                         | 27  |
| TAOK1                        | 100 |
| TAOK2                        | 63  |
| TAOK3                        | 87  |
| TBK1                         | 59  |
| TEC                          | 100 |
| TESK1                        | 80  |
| TGFBR1                       | 92  |
| TGFBR2                       | 97  |
| TIE1                         | 32  |
| TIE2                         | 82  |
| TLK1                         | 94  |
| TLK2                         | 93  |
| TNIK                         | 90  |
| TNK1                         | 97  |
| TNK2                         | 97  |
| TNNI3K                       | 74  |
| TRKA                         | 76  |
| TRKB                         | 100 |
| TRKC                         | 94  |
| TRPM6                        | 100 |
| TSSK1B                       | 92  |
| TSSK3                        | 100 |
| TTK                          | 91  |
| TXK                          | 92  |
| TYK2(JH1domain-catalytic)    | 100 |
| TYK2(JH2domain-pseudokinase) | 95  |
| TYRO3                        | 100 |
| ULK1                         | 99  |
| ULK2                         | 100 |
| ULK3                         | 98  |
| VEGFR2                       | 49  |
| VPS34                        | 100 |
| VRK2                         | 100 |
| WEE1                         | 83  |

|       |     |
|-------|-----|
| WEE2  | 100 |
| WNK1  | 82  |
| WNK2  | 100 |
| WNK3  | 95  |
| WNK4  | 100 |
| YANK1 | 100 |
| YANK2 | 80  |
| YANK3 | 95  |
| YES   | 82  |
| YSK1  | 100 |
| YSK4  | 98  |
| ZAK   | 84  |
| ZAP70 | 100 |

C) KinomeScan profiling data of **3**.

| Kinases                       | Percent<br>Control<br>at 1 uM |
|-------------------------------|-------------------------------|
| AAK1                          | 95                            |
| ABL1-nonphosphorylated        | 3.3                           |
| ABL1-phosphorylated           | 64                            |
| ABL1(E255K)-phosphorylated    | 54                            |
| ABL1(F317I)-nonphosphorylated | 53                            |
| ABL1(F317I)-phosphorylated    | 51                            |
| ABL1(F317L)-nonphosphorylated | 12                            |
| ABL1(F317L)-phosphorylated    | 95                            |
| ABL1(H396P)-nonphosphorylated | 34                            |
| ABL1(H396P)-phosphorylated    | 88                            |
| ABL1(M351T)-phosphorylated    | 93                            |
| ABL1(Q252H)-nonphosphorylated | 2.6                           |
| ABL1(Q252H)-phosphorylated    | 86                            |
| ABL1(T315I)-nonphosphorylated | 100                           |
| ABL1(T315I)-phosphorylated    | 100                           |
| ABL1(Y253F)-phosphorylated    | 78                            |
| ABL2                          | 37                            |
| ACVR1                         | 98                            |
| ACVR1B                        | 88                            |
| ACVR2A                        | 99                            |
| ACVR2B                        | 93                            |
| ACVRL1                        | 86                            |
| ADCK3                         | 99                            |
| ADCK4                         | 85                            |
| AKT1                          | 95                            |
| AKT2                          | 94                            |
| AKT3                          | 100                           |
| ALK                           | 100                           |

|               |     |
|---------------|-----|
| ALK(C1156Y)   | 100 |
| ALK(L1196M)   | 100 |
| AMPK-alpha1   | 100 |
| AMPK-alpha2   | 89  |
| ANKK1         | 100 |
| ARK5          | 99  |
| ASK1          | 72  |
| ASK2          | 100 |
| AURKA         | 100 |
| AURKB         | 82  |
| AURKC         | 85  |
| AXL           | 100 |
| BIKE          | 100 |
| BLK           | 56  |
| BMPR1A        | 91  |
| BMPR1B        | 100 |
| BMPR2         | 100 |
| BMX           | 100 |
| BRAF          | 36  |
| BRAF(V600E)   | 7.9 |
| BRK           | 100 |
| BRSK1         | 92  |
| BRSK2         | 89  |
| BTB           | 73  |
| BUB1          | 100 |
| CAMK1         | 84  |
| CAMK1B        | 98  |
| CAMK1D        | 83  |
| CAMK1G        | 99  |
| CAMK2A        | 93  |
| CAMK2B        | 96  |
| CAMK2D        | 97  |
| CAMK2G        | 97  |
| CAMK4         | 56  |
| CAMKK1        | 88  |
| CAMKK2        | 96  |
| CASK          | 100 |
| CDC2L1        | 93  |
| CDC2L2        | 100 |
| CDC2L5        | 100 |
| CDK11         | 87  |
| CDK2          | 84  |
| CDK3          | 94  |
| CDK4          | 100 |
| CDK4-cyclinD1 | 100 |
| CDK4-cyclinD3 | 100 |
| CDK5          | 100 |
| CDK7          | 95  |
| CDK8          | 100 |

|                           |      |
|---------------------------|------|
| CDK9                      | 100  |
| CDKL1                     | 91   |
| CDKL2                     | 100  |
| CDKL3                     | 84   |
| CDKL5                     | 100  |
| CHEK1                     | 100  |
| CHEK2                     | 96   |
| CIT                       | 99   |
| CLK1                      | 95   |
| CLK2                      | 93   |
| CLK3                      | 83   |
| CLK4                      | 88   |
| CSF1R                     | 0.75 |
| CSF1R-autoinhibited       | 100  |
| CSK                       | 86   |
| CSNK1A1                   | 87   |
| CSNK1A1L                  | 93   |
| CSNK1D                    | 97   |
| CSNK1E                    | 81   |
| CSNK1G1                   | 79   |
| CSNK1G2                   | 97   |
| CSNK1G3                   | 100  |
| CSNK2A1                   | 96   |
| CSNK2A2                   | 100  |
| CTK                       | 100  |
| DAPK1                     | 100  |
| DAPK2                     | 90   |
| DAPK3                     | 73   |
| DCAMKL1                   | 100  |
| DCAMKL2                   | 100  |
| DCAMKL3                   | 71   |
| DDR1                      | 0    |
| DDR2                      | 0    |
| DLK                       | 100  |
| DMPK                      | 100  |
| DMPK2                     | 92   |
| DRAK1                     | 100  |
| DRAK2                     | 100  |
| DYRK1A                    | 100  |
| DYRK1B                    | 81   |
| DYRK2                     | 100  |
| EGFR                      | 84   |
| EGFR(E746-A750del)        | 100  |
| EGFR(G719C)               | 100  |
| EGFR(G719S)               | 97   |
| EGFR(L747-E749del, A750P) | 88   |
| EGFR(L747-S752del, P753S) | 84   |
| EGFR(L747-T751del,Sins)   | 96   |
| EGFR(L858R,T790M)         | 100  |

|                    |     |
|--------------------|-----|
| EGFR(L858R)        | 100 |
| EGFR(L861Q)        | 83  |
| EGFR(S752-I759del) | 100 |
| EGFR(T790M)        | 100 |
| EIF2AK1            | 100 |
| EPHA1              | 97  |
| EPHA2              | 2.4 |
| EPHA3              | 48  |
| EPHA4              | 13  |
| EPHA5              | 12  |
| EPHA6              | 100 |
| EPHA7              | 52  |
| EPHA8              | 0   |
| EPHB1              | 22  |
| EPHB2              | 11  |
| EPHB3              | 52  |
| EPHB4              | 22  |
| EPHB6              | 91  |
| ERBB2              | 86  |
| ERBB3              | 44  |
| ERBB4              | 98  |
| ERK1               | 95  |
| ERK2               | 100 |
| ERK3               | 100 |
| ERK4               | 92  |
| ERK5               | 91  |
| ERK8               | 90  |
| ERN1               | 100 |
| FAK                | 90  |
| FER                | 97  |
| FES                | 100 |
| FGFR1              | 100 |
| FGFR2              | 100 |
| FGFR3              | 100 |
| FGFR3(G697C)       | 100 |
| FGFR4              | 99  |
| FGR                | 81  |
| FLT1               | 88  |
| FLT3               | 94  |
| FLT3-autoinhibited | 99  |
| FLT3(D835H)        | 93  |
| FLT3(D835V)        | 92  |
| FLT3(D835Y)        | 82  |
| FLT3(ITD,D835V)    | 59  |
| FLT3(ITD,F691L)    | 88  |
| FLT3(ITD)          | 100 |
| FLT3(K663Q)        | 97  |
| FLT3(N841I)        | 95  |
| FLT3(R834Q)        | 100 |

|                              |     |
|------------------------------|-----|
| FLT4                         | 100 |
| FRK                          | 39  |
| FYN                          | 95  |
| GAK                          | 94  |
| GCN2(Kin.Dom.2,S808G)        | 100 |
| GRK1                         | 100 |
| GRK2                         | 100 |
| GRK3                         | 100 |
| GRK4                         | 98  |
| GRK7                         | 91  |
| GSK3A                        | 91  |
| GSK3B                        | 100 |
| HASPIN                       | 100 |
| HCK                          | 94  |
| HIPK1                        | 87  |
| HIPK2                        | 100 |
| HIPK3                        | 100 |
| HIPK4                        | 58  |
| HPK1                         | 96  |
| HUNK                         | 93  |
| ICK                          | 100 |
| IGF1R                        | 92  |
| IKK-alpha                    | 100 |
| IKK-beta                     | 100 |
| IKK-epsilon                  | 93  |
| INSR                         | 100 |
| INSRR                        | 97  |
| IRAK1                        | 100 |
| IRAK3                        | 100 |
| IRAK4                        | 100 |
| ITK                          | 100 |
| JAK1(JH1domain-catalytic)    | 97  |
| JAK1(JH2domain-pseudokinase) | 76  |
| JAK2(JH1domain-catalytic)    | 100 |
| JAK3(JH1domain-catalytic)    | 100 |
| JNK1                         | 97  |
| JNK2                         | 100 |
| JNK3                         | 100 |
| KIT                          | 1   |
| KIT-autoinhibited            | 100 |
| KIT(A829P)                   | 54  |
| KIT(D816H)                   | 100 |
| KIT(D816V)                   | 92  |
| KIT(L576P)                   | 1.1 |
| KIT(V559D,T670I)             | 99  |
| KIT(V559D,V654A)             | 41  |
| KIT(V559D)                   | 0.5 |
| LATS1                        | 100 |
| LATS2                        | 98  |

|               |     |
|---------------|-----|
| LCK           | 70  |
| LIMK1         | 100 |
| LIMK2         | 94  |
| LKB1          | 91  |
| LOK           | 89  |
| LRRK2         | 100 |
| LRRK2(G2019S) | 100 |
| LTK           | 87  |
| LYN           | 48  |
| LZK           | 77  |
| MAK           | 100 |
| MAP3K1        | 100 |
| MAP3K15       | 100 |
| MAP3K2        | 99  |
| MAP3K3        | 97  |
| MAP3K4        | 98  |
| MAP4K2        | 100 |
| MAP4K3        | 89  |
| MAP4K4        | 83  |
| MAP4K5        | 98  |
| MAPKAPK2      | 90  |
| MAPKAPK5      | 96  |
| MARK1         | 94  |
| MARK2         | 99  |
| MARK3         | 100 |
| MARK4         | 93  |
| MAST1         | 100 |
| MEK1          | 94  |
| MEK2          | 83  |
| MEK3          | 100 |
| MEK4          | 100 |
| MEK5          | 66  |
| MEK6          | 99  |
| MELK          | 68  |
| MERTK         | 100 |
| MET           | 84  |
| MET(M1250T)   | 95  |
| MET(Y1235D)   | 76  |
| MINK          | 93  |
| MKK7          | 100 |
| MKNK1         | 100 |
| MKNK2         | 100 |
| MLCK          | 94  |
| MLK1          | 83  |
| MLK2          | 91  |
| MLK3          | 100 |
| MRCKA         | 100 |
| MRCKB         | 100 |
| MST1          | 83  |

|                       |     |
|-----------------------|-----|
| MST1R                 | 100 |
| MST2                  | 83  |
| MST3                  | 98  |
| MST4                  | 100 |
| MTOR                  | 90  |
| MUSK                  | 72  |
| MYLK                  | 98  |
| MYLK2                 | 58  |
| MYLK4                 | 100 |
| MYO3A                 | 98  |
| MYO3B                 | 100 |
| NDR1                  | 92  |
| NDR2                  | 94  |
| NEK1                  | 100 |
| NEK10                 | 100 |
| NEK11                 | 100 |
| NEK2                  | 100 |
| NEK3                  | 100 |
| NEK4                  | 100 |
| NEK5                  | 97  |
| NEK6                  | 93  |
| NEK7                  | 91  |
| NEK9                  | 100 |
| NIK                   | 100 |
| NIM1                  | 100 |
| NLK                   | 88  |
| OSR1                  | 100 |
| p38-alpha             | 30  |
| p38-beta              | 21  |
| p38-delta             | 85  |
| p38-gamma             | 88  |
| PAK1                  | 100 |
| PAK2                  | 100 |
| PAK3                  | 98  |
| PAK4                  | 98  |
| PAK6                  | 85  |
| PAK7                  | 76  |
| PCTK1                 | 100 |
| PCTK2                 | 96  |
| PCTK3                 | 93  |
| PDGFRA                | 30  |
| PDGFRB                | 0.5 |
| PDPK1                 | 99  |
| PFCDPK1(P.falciparum) | 100 |
| PFPK5(P.falciparum)   | 100 |
| PFTAIRES2             | 100 |
| PFTK1                 | 95  |
| PHKG1                 | 83  |
| PHKG2                 | 85  |

|                      |     |
|----------------------|-----|
| PIK3C2B              | 100 |
| PIK3C2G              | 91  |
| PIK3CA               | 100 |
| PIK3CA(C420R)        | 100 |
| PIK3CA(E542K)        | 100 |
| PIK3CA(E545A)        | 100 |
| PIK3CA(E545K)        | 100 |
| PIK3CA(H1047L)       | 100 |
| PIK3CA(H1047Y)       | 100 |
| PIK3CA(I800L)        | 73  |
| PIK3CA(M1043I)       | 99  |
| PIK3CA(Q546K)        | 100 |
| PIK3CB               | 100 |
| PIK3CD               | 100 |
| PIK3CG               | 99  |
| PIK4CB               | 100 |
| PIKFYVE              | 92  |
| PIM1                 | 100 |
| PIM2                 | 100 |
| PIM3                 | 96  |
| PIP5K1A              | 100 |
| PIP5K1C              | 50  |
| PIP5K2B              | 80  |
| PIP5K2C              | 98  |
| PKAC-alpha           | 96  |
| PKAC-beta            | 99  |
| PKMYT1               | 100 |
| PKN1                 | 89  |
| PKN2                 | 100 |
| PKNB(M.tuberculosis) | 100 |
| PLK1                 | 100 |
| PLK2                 | 100 |
| PLK3                 | 100 |
| PLK4                 | 100 |
| PRKCD                | 88  |
| PRKCE                | 93  |
| PRKCH                | 87  |
| PRKCI                | 94  |
| PRKCQ                | 80  |
| PRKD1                | 100 |
| PRKD2                | 100 |
| PRKD3                | 100 |
| PRKG1                | 94  |
| PRKG2                | 93  |
| PRKR                 | 100 |
| PRKX                 | 99  |
| PRP4                 | 100 |
| PYK2                 | 93  |
| QSK                  | 100 |

|                               |     |
|-------------------------------|-----|
| RAF1                          | 43  |
| RET                           | 91  |
| RET(M918T)                    | 100 |
| RET(V804L)                    | 92  |
| RET(V804M)                    | 97  |
| RIOK1                         | 98  |
| RIOK2                         | 100 |
| RIOK3                         | 100 |
| RIPK1                         | 93  |
| RIPK2                         | 99  |
| RIPK4                         | 100 |
| RIPK5                         | 98  |
| ROCK1                         | 100 |
| ROCK2                         | 100 |
| ROS1                          | 96  |
| RPS6KA4(Kin.Dom.1-N-terminal) | 100 |
| RPS6KA4(Kin.Dom.2-C-terminal) | 100 |
| RPS6KA5(Kin.Dom.1-N-terminal) | 96  |
| RPS6KA5(Kin.Dom.2-C-terminal) | 100 |
| RSK1(Kin.Dom.1-N-terminal)    | 99  |
| RSK1(Kin.Dom.2-C-terminal)    | 100 |
| RSK2(Kin.Dom.1-N-terminal)    | 100 |
| RSK2(Kin.Dom.2-C-terminal)    | 99  |
| RSK3(Kin.Dom.1-N-terminal)    | 89  |
| RSK3(Kin.Dom.2-C-terminal)    | 97  |
| RSK4(Kin.Dom.1-N-terminal)    | 100 |
| RSK4(Kin.Dom.2-C-terminal)    | 92  |
| S6K1                          | 100 |
| SBK1                          | 100 |
| SGK                           | 100 |
| SgK110                        | 94  |
| SGK2                          | 100 |
| SGK3                          | 89  |
| SIK                           | 89  |
| SIK2                          | 100 |
| SLK                           | 100 |
| SNARK                         | 100 |
| SNRK                          | 100 |
| SRC                           | 96  |
| SRMS                          | 95  |
| SRPK1                         | 99  |
| SRPK2                         | 99  |
| SRPK3                         | 100 |
| STK16                         | 79  |
| STK33                         | 92  |
| STK35                         | 100 |
| STK36                         | 100 |
| STK39                         | 100 |
| SYK                           | 100 |

|                              |     |
|------------------------------|-----|
| TAK1                         | 96  |
| TAOK1                        | 100 |
| TAOK2                        | 61  |
| TAOK3                        | 100 |
| TBK1                         | 100 |
| TEC                          | 94  |
| TESK1                        | 100 |
| TGFBR1                       | 98  |
| TGFBR2                       | 100 |
| TIE1                         | 100 |
| TIE2                         | 77  |
| TLK1                         | 84  |
| TLK2                         | 100 |
| TNIK                         | 100 |
| TNK1                         | 100 |
| TNK2                         | 100 |
| TNNI3K                       | 46  |
| TRKA                         | 28  |
| TRKB                         | 23  |
| TRKC                         | 7.4 |
| TRPM6                        | 100 |
| TSSK1B                       | 89  |
| TSSK3                        | 100 |
| TTK                          | 97  |
| TXK                          | 72  |
| TYK2(JH1domain-catalytic)    | 100 |
| TYK2(JH2domain-pseudokinase) | 100 |
| TYRO3                        | 100 |
| ULK1                         | 100 |
| ULK2                         | 100 |
| ULK3                         | 100 |
| VEGFR2                       | 100 |
| VPS34                        | 100 |
| VRK2                         | 100 |
| WEE1                         | 86  |
| WEE2                         | 88  |
| WNK1                         | 100 |
| WNK2                         | 100 |
| WNK3                         | 100 |
| WNK4                         | 98  |
| YANK1                        | 95  |
| YANK2                        | 90  |
| YANK3                        | 83  |
| YES                          | 100 |
| YSK1                         | 94  |
| YSK4                         | 100 |
| ZAK                          | 33  |
| ZAP70                        | 100 |

D) KinomeScan profiling data of **4**.

| Kinases                       | Percent Control at 1 uM |
|-------------------------------|-------------------------|
| AAK1                          | 100                     |
| ABL1(E255K)-phosphorylated    | 22                      |
| ABL1(F317I)-nonphosphorylated | 0                       |
| ABL1(F317I)-phosphorylated    | 7.8                     |
| ABL1(F317L)-nonphosphorylated | 0.5                     |
| ABL1(F317L)-phosphorylated    | 17                      |
| ABL1(H396P)-nonphosphorylated | 1.8                     |
| ABL1(H396P)-phosphorylated    | 23                      |
| ABL1(M351T)-phosphorylated    | 13                      |
| ABL1(Q252H)-nonphosphorylated | 0.55                    |
| ABL1(Q252H)-phosphorylated    | 27                      |
| ABL1(T315I)-nonphosphorylated | 0                       |
| ABL1(T315I)-phosphorylated    | 4.4                     |
| ABL1(Y253F)-phosphorylated    | 22                      |
| ABL1-nonphosphorylated        | 0.1                     |
| ABL1-phosphorylated           | 8.8                     |
| ABL2                          | 15                      |
| ACVR1                         | 100                     |
| ACVR1B                        | 100                     |
| ACVR2A                        | 93                      |
| ACVR2B                        | 97                      |
| ACVRL1                        | 100                     |
| ADCK3                         | 99                      |
| ADCK4                         | 100                     |
| AKT1                          | 100                     |
| AKT2                          | 100                     |
| AKT3                          | 100                     |
| ALK                           | 50                      |
| ALK(C1156Y)                   | 97                      |
| ALK(L1196M)                   | 68                      |
| AMPK-alpha1                   | 100                     |
| AMPK-alpha2                   | 90                      |
| ANKK1                         | 5                       |

|               |      |
|---------------|------|
| ARK5          | 100  |
| ASK1          | 96   |
| ASK2          | 60   |
| AURKA         | 80   |
| AURKB         | 71   |
| AURKC         | 40   |
| AXL           | 58   |
| BIKE          | 78   |
| BLK           | 0.95 |
| BMPR1A        | 100  |
| BMPR1B        | 79   |
| BMPR2         | 76   |
| BMX           | 100  |
| BRAF          | 31   |
| BRAF(V600E)   | 12   |
| BRK           | 100  |
| BRSK1         | 95   |
| BRSK2         | 92   |
| BTK           | 68   |
| BUB1          | 87   |
| CAMK1         | 100  |
| CAMK1D        | 100  |
| CAMK1G        | 95   |
| CAMK2A        | 100  |
| CAMK2B        | 96   |
| CAMK2D        | 100  |
| CAMK2G        | 100  |
| CAMK4         | 100  |
| CAMKK1        | 100  |
| CAMKK2        | 100  |
| CASK          | 94   |
| CDC2L1        | 100  |
| CDC2L2        | 100  |
| CDC2L5        | 48   |
| CDK11         | 1.2  |
| CDK2          | 98   |
| CDK3          | 67   |
| CDK4-cyclinD1 | 93   |

|                     |      |
|---------------------|------|
| CDK4-cyclinD3       | 90   |
| CDK5                | 100  |
| CDK7                | 27   |
| CDK8                | 0    |
| CDK9                | 100  |
| CDKL1               | 77   |
| CDKL2               | 0.2  |
| CDKL3               | 10   |
| CDKL5               | 95   |
| CHEK1               | 95   |
| CHEK2               | 79   |
| CIT                 | 58   |
| CLK1                | 62   |
| CLK2                | 94   |
| CLK3                | 95   |
| CLK4                | 31   |
| CSF1R               | 0.65 |
| CSF1R-autoinhibited | 84   |
| CSK                 | 99   |
| CSNK1A1             | 96   |
| CSNK1A1L            | 96   |
| CSNK1D              | 100  |
| CSNK1E              | 100  |
| CSNK1G1             | 92   |
| CSNK1G2             | 100  |
| CSNK1G3             | 93   |
| CSNK2A1             | 99   |
| CSNK2A2             | 76   |
| CTK                 | 97   |
| DAPK1               | 100  |
| DAPK2               | 88   |
| DAPK3               | 89   |
| DCAMKL1             | 53   |
| DCAMKL2             | 72   |
| DCAMKL3             | 99   |
| DDR1                | 0.2  |
| DDR2                | 6.6  |
| DLK                 | 100  |

|                           |     |
|---------------------------|-----|
| DMPK                      | 100 |
| DMPK2                     | 84  |
| DRAK1                     | 100 |
| DRAK2                     | 100 |
| DYRK1A                    | 88  |
| DYRK1B                    | 46  |
| DYRK2                     | 45  |
| EGFR                      | 83  |
| EGFR(E746-A750del)        | 77  |
| EGFR(G719C)               | 62  |
| EGFR(G719S)               | 61  |
| EGFR(L747-E749del, A750P) | 66  |
| EGFR(L747-S752del, P753S) | 95  |
| EGFR(L747-T751del,Sins)   | 66  |
| EGFR(L858R)               | 91  |
| EGFR(L858R,T790M)         | 100 |
| EGFR(L861Q)               | 78  |
| EGFR(S752-I759del)        | 90  |
| EGFR(T790M)               | 71  |
| EIF2AK1                   | 85  |
| EPHA1                     | 100 |
| EPHA2                     | 30  |
| EPHA3                     | 31  |
| EPHA4                     | 67  |
| EPHA5                     | 52  |
| EPHA6                     | 100 |
| EPHA7                     | 96  |
| EPHA8                     | 2.4 |
| EPHB1                     | 74  |
| EPHB2                     | 47  |
| EPHB3                     | 100 |
| EPHB4                     | 100 |
| EPHB6                     | 85  |
| ERBB2                     | 90  |
| ERBB3                     | 93  |
| ERBB4                     | 86  |
| ERK1                      | 91  |
| ERK2                      | 89  |

|                       |     |
|-----------------------|-----|
| ERK3                  | 76  |
| ERK4                  | 100 |
| ERK5                  | 91  |
| ERK8                  | 15  |
| ERN1                  | 92  |
| FAK                   | 98  |
| FER                   | 100 |
| FES                   | 100 |
| FGFR1                 | 88  |
| FGFR2                 | 86  |
| FGFR3                 | 100 |
| FGFR3(G697C)          | 99  |
| FGFR4                 | 100 |
| FGR                   | 23  |
| FLT1                  | 4.6 |
| FLT3                  | 2   |
| FLT3(D835H)           | 0.3 |
| FLT3(D835Y)           | 0.5 |
| FLT3(ITD)             | 5.6 |
| FLT3(K663Q)           | 0.1 |
| FLT3(N841I)           | 0   |
| FLT3(R834Q)           | 0   |
| FLT3-autoinhibited    | 11  |
| FLT4                  | 0.9 |
| FRK                   | 20  |
| FYN                   | 71  |
| GAK                   | 77  |
| GCN2(Kin.Dom.2,S808G) | 100 |
| GRK1                  | 99  |
| GRK4                  | 99  |
| GRK7                  | 97  |
| GSK3A                 | 98  |
| GSK3B                 | 80  |
| HASPIN                | 75  |
| HCK                   | 38  |
| HIPK1                 | 20  |
| HIPK2                 | 39  |
| HIPK3                 | 11  |

|                              |      |
|------------------------------|------|
| HIPK4                        | 49   |
| HPK1                         | 70   |
| HUNK                         | 75   |
| ICK                          | 87   |
| IGF1R                        | 96   |
| IKK-alpha                    | 0.55 |
| IKK-beta                     | 7.8  |
| IKK-epsilon                  | 87   |
| INSR                         | 64   |
| INSRR                        | 79   |
| IRAK1                        | 55   |
| IRAK3                        | 77   |
| IRAK4                        | 68   |
| ITK                          | 100  |
| JAK1(JH1domain-catalytic)    | 88   |
| JAK1(JH2domain-pseudokinase) | 100  |
| JAK2(JH1domain-catalytic)    | 41   |
| JAK3(JH1domain-catalytic)    | 40   |
| JNK1                         | 71   |
| JNK2                         | 5.3  |
| JNK3                         | 50   |
| KIT                          | 0.05 |
| KIT(A829P)                   | 0    |
| KIT(D816H)                   | 21   |
| KIT(D816V)                   | 12   |
| KIT(L576P)                   | 0    |
| KIT(V559D)                   | 0.05 |
| KIT(V559D,T670I)             | 0.55 |
| KIT(V559D,V654A)             | 2.4  |
| KIT-autoinhibited            | 55   |
| LATS1                        | 89   |
| LATS2                        | 49   |
| LCK                          | 0.95 |
| LIMK1                        | 100  |
| LIMK2                        | 78   |
| LKB1                         | 100  |
| LOK                          | 0.9  |
| LRRK2                        | 92   |

|               |     |
|---------------|-----|
| LRRK2(G2019S) | 97  |
| LTK           | 98  |
| LYN           | 22  |
| LZK           | 88  |
| MAK           | 93  |
| MAP3K1        | 59  |
| MAP3K15       | 97  |
| MAP3K2        | 87  |
| MAP3K3        | 100 |
| MAP3K4        | 88  |
| MAP4K2        | 79  |
| MAP4K3        | 57  |
| MAP4K4        | 2.6 |
| MAP4K5        | 87  |
| MAPKAPK2      | 90  |
| MAPKAPK5      | 64  |
| MARK1         | 97  |
| MARK2         | 95  |
| MARK3         | 96  |
| MARK4         | 93  |
| MAST1         | 74  |
| MEK1          | 84  |
| MEK2          | 72  |
| MEK3          | 97  |
| MEK4          | 100 |
| MEK5          | 15  |
| MEK6          | 100 |
| MELK          | 9.7 |
| MERTK         | 59  |
| MET           | 90  |
| MET(M1250T)   | 91  |
| MET(Y1235D)   | 89  |
| MINK          | 5.1 |
| MKK7          | 88  |
| MKNK1         | 0   |
| MKNK2         | 0   |
| MLCK          | 81  |
| MLK1          | 91  |

|           |      |
|-----------|------|
| MLK2      | 92   |
| MLK3      | 100  |
| MRCKA     | 100  |
| MRCKB     | 100  |
| MST1      | 85   |
| MST1R     | 99   |
| MST2      | 70   |
| MST3      | 100  |
| MST4      | 95   |
| MTOR      | 82   |
| MUSK      | 0.15 |
| MYLK      | 91   |
| MYLK2     | 100  |
| MYLK4     | 94   |
| MYO3A     | 50   |
| MYO3B     | 86   |
| NDR1      | 47   |
| NDR2      | 58   |
| NEK1      | 94   |
| NEK10     | 86   |
| NEK11     | 100  |
| NEK2      | 92   |
| NEK3      | 86   |
| NEK4      | 97   |
| NEK5      | 88   |
| NEK6      | 95   |
| NEK7      | 93   |
| NEK9      | 91   |
| NIK       | 78   |
| NIM1      | 73   |
| NLK       | 22   |
| OSR1      | 68   |
| p38-alpha | 1    |
| p38-beta  | 7.6  |
| p38-delta | 68   |
| p38-gamma | 14   |
| PAK1      | 100  |
| PAK2      | 86   |

|                       |      |
|-----------------------|------|
| PAK3                  | 56   |
| PAK4                  | 96   |
| PAK6                  | 100  |
| PAK7                  | 100  |
| PCTK1                 | 94   |
| PCTK2                 | 86   |
| PCTK3                 | 82   |
| PDGFRA                | 1    |
| PDGFRB                | 0    |
| PDPK1                 | 100  |
| PFCDPK1(P.falciparum) | 0.45 |
| PFPK5(P.falciparum)   | 91   |
| PFTAIRE2              | 89   |
| PFTK1                 | 95   |
| PHKG1                 | 100  |
| PHKG2                 | 93   |
| PIK3C2B               | 100  |
| PIK3C2G               | 68   |
| PIK3CA                | 95   |
| PIK3CA(C420R)         | 58   |
| PIK3CA(E542K)         | 80   |
| PIK3CA(E545A)         | 81   |
| PIK3CA(E545K)         | 78   |
| PIK3CA(H1047L)        | 76   |
| PIK3CA(H1047Y)        | 52   |
| PIK3CA(I800L)         | 66   |
| PIK3CA(M1043I)        | 50   |
| PIK3CA(Q546K)         | 86   |
| PIK3CB                | 87   |
| PIK3CD                | 69   |
| PIK3CG                | 100  |
| PIK4CB                | 100  |
| PIM1                  | 93   |
| PIM2                  | 93   |
| PIM3                  | 92   |
| PIP5K1A               | 98   |
| PIP5K1C               | 71   |
| PIP5K2B               | 97   |

|                      |      |
|----------------------|------|
| PIP5K2C              | 97   |
| PKAC-alpha           | 46   |
| PKAC-beta            | 36   |
| PKMYT1               | 100  |
| PKN1                 | 100  |
| PKN2                 | 92   |
| PKNB(M.tuberculosis) | 70   |
| PLK1                 | 64   |
| PLK2                 | 69   |
| PLK3                 | 62   |
| PLK4                 | 72   |
| PRKCD                | 96   |
| PRKCE                | 89   |
| PRKCH                | 90   |
| PRKCI                | 86   |
| PRKCQ                | 87   |
| PRKD1                | 100  |
| PRKD2                | 91   |
| PRKD3                | 97   |
| PRKG1                | 92   |
| PRKG2                | 96   |
| PRKR                 | 84   |
| PRKX                 | 92   |
| PRP4                 | 100  |
| PYK2                 | 87   |
| QSK                  | 90   |
| RAF1                 | 62   |
| RET                  | 0    |
| RET(M918T)           | 0    |
| RET(V804L)           | 0.25 |
| RET(V804M)           | 0.15 |
| RIOK1                | 83   |
| RIOK2                | 18   |
| RIOK3                | 76   |
| RIPK1                | 74   |
| RIPK2                | 10   |
| RIPK4                | 78   |
| RIPK5                | 66   |

|                               |     |
|-------------------------------|-----|
| ROCK1                         | 76  |
| ROCK2                         | 7.6 |
| ROS1                          | 100 |
| RPS6KA4(Kin.Dom.1-N-terminal) | 100 |
| RPS6KA4(Kin.Dom.2-C-terminal) | 72  |
| RPS6KA5(Kin.Dom.1-N-terminal) | 82  |
| RPS6KA5(Kin.Dom.2-C-terminal) | 70  |
| RSK1(Kin.Dom.1-N-terminal)    | 80  |
| RSK1(Kin.Dom.2-C-terminal)    | 100 |
| RSK2(Kin.Dom.1-N-terminal)    | 77  |
| RSK2(Kin.Dom.2-C-terminal)    | 100 |
| RSK3(Kin.Dom.1-N-terminal)    | 68  |
| RSK3(Kin.Dom.2-C-terminal)    | 74  |
| RSK4(Kin.Dom.1-N-terminal)    | 85  |
| RSK4(Kin.Dom.2-C-terminal)    | 76  |
| S6K1                          | 76  |
| SBK1                          | 69  |
| SGK                           | 73  |
| SgK110                        | 98  |
| SGK2                          | 79  |
| SGK3                          | 60  |
| SIK                           | 86  |
| SIK2                          | 100 |
| SLK                           | 100 |
| SNARK                         | 85  |
| SNRK                          | 98  |
| SRC                           | 90  |
| SRMS                          | 52  |
| SRPK1                         | 62  |
| SRPK2                         | 100 |
| SRPK3                         | 94  |
| STK16                         | 93  |
| STK33                         | 79  |
| STK35                         | 100 |
| STK36                         | 79  |
| STK39                         | 79  |
| SYK                           | 100 |
| TAK1                          | 5.8 |

|                              |     |
|------------------------------|-----|
| TAOK1                        | 74  |
| TAOK2                        | 78  |
| TAOK3                        | 83  |
| TBK1                         | 71  |
| TEC                          | 100 |
| TESK1                        | 100 |
| TGFBR1                       | 100 |
| TGFBR2                       | 99  |
| TIE1                         | 7.8 |
| TIE2                         | 14  |
| TLK1                         | 100 |
| TLK2                         | 100 |
| TNIK                         | 21  |
| TNK1                         | 100 |
| TNK2                         | 100 |
| TNNI3K                       | 43  |
| TRKA                         | 0.3 |
| TRKB                         | 0.4 |
| TRKC                         | 0.8 |
| TRPM6                        | 84  |
| TSSK1B                       | 100 |
| TTK                          | 85  |
| TXK                          | 100 |
| TYK2(JH1domain-catalytic)    | 70  |
| TYK2(JH2domain-pseudokinase) | 88  |
| TYRO3                        | 100 |
| ULK1                         | 68  |
| ULK2                         | 70  |
| ULK3                         | 72  |
| VEGFR2                       | 1.9 |
| VRK2                         | 91  |
| WEE1                         | 93  |
| WEE2                         | 97  |
| WNK1                         | 80  |
| WNK3                         | 71  |
| YANK1                        | 96  |
| YANK2                        | 85  |
| YANK3                        | 100 |

|       |     |
|-------|-----|
| YES   | 84  |
| YSK1  | 99  |
| YSK4  | 67  |
| ZAK   | 3.4 |
| ZAP70 | 95  |

E) KinomeScan profiling data of **5**.

| Kinases                       | Percent<br>Control<br>at 1 uM |
|-------------------------------|-------------------------------|
| AAK1                          | 82                            |
| ABL1(E255K)-phosphorylated    | 0.1                           |
| ABL1(F317I)-nonphosphorylated | 0.15                          |
| ABL1(F317I)-phosphorylated    | 3.1                           |
| ABL1(F317L)-nonphosphorylated | 6.7                           |
| ABL1(F317L)-phosphorylated    | 1.6                           |
| ABL1(H396P)-nonphosphorylated | 0                             |
| ABL1(H396P)-phosphorylated    | 0                             |
| ABL1(M351T)-phosphorylated    | 0.4                           |
| ABL1(Q252H)-nonphosphorylated | 0.15                          |
| ABL1(Q252H)-phosphorylated    | 0.3                           |
| ABL1(T315I)-nonphosphorylated | 8                             |
| ABL1(T315I)-phosphorylated    | 73                            |
| ABL1(Y253F)-phosphorylated    | 0.1                           |
| ABL1-nonphosphorylated        | 0.05                          |
| ABL1-phosphorylated           | 0                             |
| ABL2                          | 0.45                          |
| ACVR1                         | 100                           |
| ACVR1B                        | 93                            |
| ACVR2A                        | 100                           |
| ACVR2B                        | 92                            |
| ACVRL1                        | 79                            |
| ADCK3                         | 100                           |
| ADCK4                         | 94                            |
| AKT1                          | 85                            |
| AKT2                          | 89                            |
| AKT3                          | 87                            |
| ALK                           | 100                           |
| ALK(C1156Y)                   | 100                           |
| ALK(L1196M)                   | 100                           |
| AMPK-alpha1                   | 71                            |
| AMPK-alpha2                   | 91                            |
| ANKK1                         | 43                            |
| ARK5                          | 100                           |
| ASK1                          | 89                            |

|               |      |
|---------------|------|
| ASK2          | 97   |
| AURKA         | 85   |
| AURKB         | 94   |
| AURKC         | 84   |
| AXL           | 94   |
| BIKE          | 97   |
| BLK           | 0    |
| BMPR1A        | 92   |
| BMPR1B        | 100  |
| BMPR2         | 100  |
| BMX           | 3.7  |
| BRAF          | 6.4  |
| BRAF(V600E)   | 1.1  |
| BRK           | 77   |
| BRSK1         | 95   |
| BRSK2         | 86   |
| BTK           | 0.55 |
| BUB1          | 90   |
| CAMK1         | 58   |
| CAMK1B        | 100  |
| CAMK1D        | 76   |
| CAMK1G        | 92   |
| CAMK2A        | 99   |
| CAMK2B        | 91   |
| CAMK2D        | 92   |
| CAMK2G        | 99   |
| CAMK4         | 79   |
| CAMKK1        | 77   |
| CAMKK2        | 90   |
| CASK          | 92   |
| CDC2L1        | 27   |
| CDC2L2        | 33   |
| CDC2L5        | 100  |
| CDK11         | 31   |
| CDK2          | 100  |
| CDK3          | 100  |
| CDK4          | 100  |
| CDK4-cyclinD1 | 100  |
| CDK4-cyclinD3 | 100  |
| CDK5          | 98   |
| CDK7          | 95   |
| CDK8          | 53   |
| CDK9          | 100  |
| CDKL1         | 56   |
| CDKL2         | 55   |
| CDKL3         | 32   |
| CDKL5         | 100  |
| CHEK1         | 100  |
| CHEK2         | 90   |

|                           |      |
|---------------------------|------|
| CIT                       | 64   |
| CLK1                      | 100  |
| CLK2                      | 90   |
| CLK3                      | 100  |
| CLK4                      | 80   |
| CSF1R                     | 0    |
| CSF1R-autoinhibited       | 81   |
| CSK                       | 2.9  |
| CSNK1A1                   | 54   |
| CSNK1A1L                  | 91   |
| CSNK1D                    | 88   |
| CSNK1E                    | 85   |
| CSNK1G1                   | 90   |
| CSNK1G2                   | 100  |
| CSNK1G3                   | 85   |
| CSNK2A1                   | 100  |
| CSNK2A2                   | 100  |
| CTK                       | 49   |
| DAPK1                     | 88   |
| DAPK2                     | 94   |
| DAPK3                     | 78   |
| DCAMKL1                   | 68   |
| DCAMKL2                   | 100  |
| DCAMKL3                   | 73   |
| DDR1                      | 0.05 |
| DDR2                      | 0.2  |
| DLK                       | 49   |
| DMPK                      | 96   |
| DMPK2                     | 100  |
| DRAK1                     | 100  |
| DRAK2                     | 94   |
| DYRK1A                    | 99   |
| DYRK1B                    | 80   |
| DYRK2                     | 91   |
| EGFR                      | 5    |
| EGFR(E746-A750del)        | 18   |
| EGFR(G719C)               | 1.1  |
| EGFR(G719S)               | 5.3  |
| EGFR(L747-E749del, A750P) | 3.2  |
| EGFR(L747-S752del, P753S) | 8.5  |
| EGFR(L747-T751del,Sins)   | 7.1  |
| EGFR(L858R)               | 2.7  |
| EGFR(L858R,T790M)         | 32   |
| EGFR(L861Q)               | 0.85 |
| EGFR(S752-I759del)        | 1.2  |
| EGFR(T790M)               | 29   |
| EIF2AK1                   | 100  |
| EPHA1                     | 41   |
| EPHA2                     | 1.6  |

|                       |      |
|-----------------------|------|
| EPHA3                 | 31   |
| EPHA4                 | 0.15 |
| EPHA5                 | 1.3  |
| EPHA6                 | 100  |
| EPHA7                 | 100  |
| EPHA8                 | 0.5  |
| EPHB1                 | 3.6  |
| EPHB2                 | 0    |
| EPHB3                 | 48   |
| EPHB4                 | 17   |
| EPHB6                 | 78   |
| ERBB2                 | 0.25 |
| ERBB3                 | 85   |
| ERBB4                 | 2.2  |
| ERK1                  | 100  |
| ERK2                  | 91   |
| ERK3                  | 97   |
| ERK4                  | 83   |
| ERK5                  | 86   |
| ERK8                  | 79   |
| ERN1                  | 76   |
| FAK                   | 92   |
| FER                   | 71   |
| FES                   | 76   |
| FGFR1                 | 23   |
| FGFR2                 | 39   |
| FGFR3                 | 100  |
| FGFR3(G697C)          | 100  |
| FGFR4                 | 90   |
| FGR                   | 0.85 |
| FLT1                  | 6.5  |
| FLT3                  | 0.5  |
| FLT3(D835H)           | 5.9  |
| FLT3(D835V)           | 19   |
| FLT3(D835Y)           | 30   |
| FLT3(ITD)             | 4.1  |
| FLT3(ITD,D835V)       | 100  |
| FLT3(ITD,F691L)       | 9.9  |
| FLT3(K663Q)           | 7.3  |
| FLT3(N841I)           | 0.05 |
| FLT3(R834Q)           | 3.3  |
| FLT3-autoinhibited    | 59   |
| FLT4                  | 5.1  |
| FRK                   | 4.9  |
| FYN                   | 6.6  |
| GAK                   | 12   |
| GCN2(Kin.Dom.2,S808G) | 16   |
| GRK1                  | 80   |
| GRK2                  | 100  |

|                              |      |
|------------------------------|------|
| GRK3                         | 100  |
| GRK4                         | 93   |
| GRK7                         | 100  |
| GSK3A                        | 100  |
| GSK3B                        | 84   |
| HASPIN                       | 100  |
| HCK                          | 1.4  |
| HIPK1                        | 62   |
| HIPK2                        | 100  |
| HIPK3                        | 95   |
| HIPK4                        | 72   |
| HPK1                         | 14   |
| HUNK                         | 84   |
| ICK                          | 100  |
| IGF1R                        | 100  |
| IKK-alpha                    | 15   |
| IKK-beta                     | 29   |
| IKK-epsilon                  | 100  |
| INSR                         | 72   |
| INSRR                        | 85   |
| IRAK1                        | 100  |
| IRAK3                        | 97   |
| IRAK4                        | 100  |
| ITK                          | 91   |
| JAK1(JH1domain-catalytic)    | 79   |
| JAK1(JH2domain-pseudokinase) | 49   |
| JAK2(JH1domain-catalytic)    | 39   |
| JAK3(JH1domain-catalytic)    | 5.2  |
| JNK1                         | 77   |
| JNK2                         | 0.8  |
| JNK3                         | 80   |
| KIT                          | 0.1  |
| KIT(A829P)                   | 12   |
| KIT(D816H)                   | 12   |
| KIT(D816V)                   | 19   |
| KIT(L576P)                   | 0    |
| KIT(V559D)                   | 0.1  |
| KIT(V559D,T670I)             | 1.4  |
| KIT(V559D,V654A)             | 1.4  |
| KIT-autoinhibited            | 75   |
| LATS1                        | 100  |
| LATS2                        | 100  |
| LCK                          | 0.4  |
| LIMK1                        | 98   |
| LIMK2                        | 96   |
| LKB1                         | 99   |
| LOK                          | 0.15 |
| LRRK2                        | 100  |
| LRRK2(G2019S)                | 63   |

|             |     |
|-------------|-----|
| LTK         | 96  |
| LYN         | 0   |
| LZK         | 81  |
| MAK         | 97  |
| MAP3K1      | 72  |
| MAP3K15     | 100 |
| MAP3K2      | 16  |
| MAP3K3      | 11  |
| MAP3K4      | 90  |
| MAP4K2      | 52  |
| MAP4K3      | 100 |
| MAP4K4      | 18  |
| MAP4K5      | 54  |
| MAPKAPK2    | 100 |
| MAPKAPK5    | 100 |
| MARK1       | 88  |
| MARK2       | 90  |
| MARK3       | 100 |
| MARK4       | 89  |
| MAST1       | 100 |
| MEK1        | 97  |
| MEK2        | 87  |
| MEK3        | 99  |
| MEK4        | 97  |
| MEK5        | 0.5 |
| MEK6        | 95  |
| MELK        | 82  |
| MERTK       | 100 |
| MET         | 92  |
| MET(M1250T) | 84  |
| MET(Y1235D) | 100 |
| MINK        | 45  |
| MKK7        | 96  |
| MKNK1       | 100 |
| MKNK2       | 95  |
| MLCK        | 83  |
| MLK1        | 100 |
| MLK2        | 54  |
| MLK3        | 96  |
| MRCKA       | 99  |
| MRCKB       | 100 |
| MST1        | 76  |
| MST1R       | 88  |
| MST2        | 100 |
| MST3        | 79  |
| MST4        | 75  |
| MTOR        | 98  |
| MUSK        | 2   |
| MYLK        | 92  |

|                       |     |
|-----------------------|-----|
| MYLK2                 | 100 |
| MYLK4                 | 93  |
| MYO3A                 | 69  |
| MYO3B                 | 92  |
| NDR1                  | 57  |
| NDR2                  | 75  |
| NEK1                  | 96  |
| NEK10                 | 100 |
| NEK11                 | 45  |
| NEK2                  | 99  |
| NEK3                  | 88  |
| NEK4                  | 48  |
| NEK5                  | 100 |
| NEK6                  | 92  |
| NEK7                  | 98  |
| NEK9                  | 95  |
| NIK                   | 89  |
| NIM1                  | 100 |
| NLK                   | 12  |
| OSR1                  | 96  |
| p38-alpha             | 0   |
| p38-beta              | 3.6 |
| p38-delta             | 75  |
| p38-gamma             | 20  |
| PAK1                  | 87  |
| PAK2                  | 80  |
| PAK3                  | 23  |
| PAK4                  | 89  |
| PAK6                  | 86  |
| PAK7                  | 97  |
| PCTK1                 | 90  |
| PCTK2                 | 97  |
| PCTK3                 | 100 |
| PDGFRA                | 0.7 |
| PDGFRB                | 0   |
| PDPK1                 | 92  |
| PFCDPK1(P.falciparum) | 0.6 |
| PFPK5(P.falciparum)   | 100 |
| PFTAIRE2              | 93  |
| PFTK1                 | 96  |
| PHKG1                 | 95  |
| PHKG2                 | 94  |
| PIK3C2B               | 87  |
| PIK3C2G               | 100 |
| PIK3CA                | 100 |
| PIK3CA(C420R)         | 98  |
| PIK3CA(E542K)         | 93  |
| PIK3CA(E545A)         | 47  |
| PIK3CA(E545K)         | 68  |

|                      |     |
|----------------------|-----|
| PIK3CA(H1047L)       | 100 |
| PIK3CA(H1047Y)       | 50  |
| PIK3CA(I800L)        | 56  |
| PIK3CA(M1043I)       | 100 |
| PIK3CA(Q546K)        | 100 |
| PIK3CB               | 100 |
| PIK3CD               | 100 |
| PIK3CG               | 100 |
| PIK4CB               | 60  |
| PIKFYVE              | 78  |
| PIM1                 | 84  |
| PIM2                 | 94  |
| PIM3                 | 96  |
| PIP5K1A              | 96  |
| PIP5K1C              | 86  |
| PIP5K2B              | 82  |
| PIP5K2C              | 96  |
| PKAC-alpha           | 46  |
| PKAC-beta            | 43  |
| PKMYT1               | 100 |
| PKN1                 | 100 |
| PKN2                 | 91  |
| PKNB(M.tuberculosis) | 100 |
| PLK1                 | 100 |
| PLK2                 | 97  |
| PLK3                 | 78  |
| PLK4                 | 96  |
| PRKCD                | 10  |
| PRKCE                | 39  |
| PRKCH                | 88  |
| PRKCI                | 42  |
| PRKCQ                | 12  |
| PRKD1                | 97  |
| PRKD2                | 100 |
| PRKD3                | 100 |
| PRKG1                | 80  |
| PRKG2                | 98  |
| PRKR                 | 77  |
| PRKX                 | 83  |
| PRP4                 | 87  |
| PYK2                 | 42  |
| QSK                  | 70  |
| RAF1                 | 17  |
| RET                  | 0   |
| RET(M918T)           | 0.1 |
| RET(V804L)           | 2.5 |
| RET(V804M)           | 0.4 |
| RIOK1                | 100 |
| RIOK2                | 100 |

|                               |     |
|-------------------------------|-----|
| RIOK3                         | 85  |
| RIPK1                         | 69  |
| RIPK2                         | 38  |
| RIPK4                         | 100 |
| RIPK5                         | 92  |
| ROCK1                         | 100 |
| ROCK2                         | 100 |
| ROS1                          | 100 |
| RPS6KA4(Kin.Dom.1-N-terminal) | 52  |
| RPS6KA4(Kin.Dom.2-C-terminal) | 100 |
| RPS6KA5(Kin.Dom.1-N-terminal) | 55  |
| RPS6KA5(Kin.Dom.2-C-terminal) | 100 |
| RSK1(Kin.Dom.1-N-terminal)    | 100 |
| RSK1(Kin.Dom.2-C-terminal)    | 66  |
| RSK2(Kin.Dom.1-N-terminal)    | 96  |
| RSK2(Kin.Dom.2-C-terminal)    | 98  |
| RSK3(Kin.Dom.1-N-terminal)    | 87  |
| RSK3(Kin.Dom.2-C-terminal)    | 70  |
| RSK4(Kin.Dom.1-N-terminal)    | 100 |
| RSK4(Kin.Dom.2-C-terminal)    | 43  |
| S6K1                          | 70  |
| SBK1                          | 91  |
| SGK                           | 100 |
| SgK110                        | 81  |
| SGK2                          | 100 |
| SGK3                          | 100 |
| SIK                           | 1.6 |
| SIK2                          | 36  |
| SLK                           | 45  |
| SNARK                         | 100 |
| SNRK                          | 100 |
| SRC                           | 0.1 |
| SRMS                          | 0.6 |
| SRPK1                         | 26  |
| SRPK2                         | 84  |
| SRPK3                         | 75  |
| STK16                         | 91  |
| STK33                         | 84  |
| STK35                         | 86  |
| STK36                         | 2.3 |
| STK39                         | 100 |
| SYK                           | 27  |
| TAK1                          | 1.4 |
| TAOK1                         | 100 |
| TAOK2                         | 55  |
| TAOK3                         | 69  |
| TBK1                          | 59  |
| TEC                           | 7.2 |
| TESK1                         | 100 |

|                              |     |
|------------------------------|-----|
| TGFBR1                       | 91  |
| TGFBR2                       | 26  |
| TIE1                         | 8.4 |
| TIE2                         | 34  |
| TLK1                         | 82  |
| TLK2                         | 96  |
| TNIK                         | 51  |
| TNK1                         | 49  |
| TNK2                         | 58  |
| TNNI3K                       | 25  |
| TRKA                         | 16  |
| TRKB                         | 53  |
| TRKC                         | 6.6 |
| TRPM6                        | 100 |
| TSSK1B                       | 91  |
| TSSK3                        | 100 |
| TTK                          | 54  |
| TXK                          | 1.9 |
| TYK2(JH1domain-catalytic)    | 100 |
| TYK2(JH2domain-pseudokinase) | 99  |
| TYRO3                        | 58  |
| ULK1                         | 100 |
| ULK2                         | 100 |
| ULK3                         | 14  |
| VEGFR2                       | 5.9 |
| VPS34                        | 100 |
| VRK2                         | 100 |
| WEE1                         | 95  |
| WEE2                         | 100 |
| WNK1                         | 77  |
| WNK2                         | 100 |
| WNK3                         | 100 |
| WNK4                         | 100 |
| YANK1                        | 100 |
| YANK2                        | 81  |
| YANK3                        | 90  |
| YES                          | 1.6 |
| YSK1                         | 74  |
| YSK4                         | 100 |
| ZAK                          | 4.5 |
| ZAP70                        | 100 |

F) KinomeScan profiling data of **6**.

| Kinases | Percent<br>Control<br>at 1 uM |
|---------|-------------------------------|
|---------|-------------------------------|

|             |        |
|-------------|--------|
| AAK1        | No Hit |
| ABL1        | 0.3    |
| ABL1(E255K) | 0.75   |
| ABL1(H396P) | 0.5    |
| ABL1(M351T) | 0.4    |
| ABL1(Q252H) | 0.45   |
| ABL1(T315I) | 9.4    |
| ABL1(Y253F) | 0.25   |
| ABL2        | 0.1    |
| ACVR1       | No Hit |
| ACVR1B      | No Hit |
| ACVR2A      | No Hit |
| ACVR2B      | No Hit |
| ACVRL1      | No Hit |
| ADCK3       | No Hit |
| ADCK4       | No Hit |
| AKT1        | No Hit |
| AKT2        | No Hit |
| AKT3        | No Hit |
| ALK         | No Hit |
| AMPK-alpha1 | No Hit |
| AMPK-alpha2 | No Hit |
| ANKK1       | No Hit |
| ARK5        | No Hit |
| AURKA       | No Hit |
| AURKB       | No Hit |
| AURKC       | No Hit |
| AXL         | No Hit |
| BIKE        | No Hit |
| BLK         | 2.3    |
| BMPR1A      | No Hit |
| BMPR2       | No Hit |
| BMX         | 0.35   |
| BRAF        | No Hit |
| BRAF(V600E) | 15     |
| BRSK1       | No Hit |
| BRSK2       | No Hit |
| BTK         | 1      |
| CAMK1       | No Hit |
| CAMK1D      | No Hit |
| CAMK1G      | No Hit |
| CAMK2A      | No Hit |
| CAMK2B      | No Hit |
| CAMK2D      | No Hit |
| CAMK2G      | No Hit |
| CAMK4       | No Hit |
| CAMKK1      | No Hit |
| CAMKK2      | No Hit |
| CDC2L1      | No Hit |

|                              |        |
|------------------------------|--------|
| CDC2L2                       | 36     |
| CDK11                        | 1.2    |
| CDK2                         | No Hit |
| CDK3                         | No Hit |
| CDK5                         | No Hit |
| CDK7                         | No Hit |
| CDK8                         | 5.6    |
| CDK9                         | No Hit |
| CHEK1                        | No Hit |
| CIT                          | No Hit |
| CLK1                         | No Hit |
| CLK2                         | No Hit |
| CLK3                         | No Hit |
| CLK4                         | No Hit |
| CSF1R                        | 0.35   |
| CSK                          | 1.6    |
| CSNK1A1L                     | No Hit |
| CSNK1D                       | No Hit |
| CSNK1E                       | No Hit |
| CSNK1G1                      | No Hit |
| CSNK1G2                      | No Hit |
| CSNK1G3                      | No Hit |
| CSNK2A1                      | No Hit |
| CSNK2A2                      | No Hit |
| DAPK1                        | No Hit |
| DAPK2                        | No Hit |
| DAPK3                        | No Hit |
| DCAMKL1                      | No Hit |
| DCAMKL2                      | No Hit |
| DCAMKL3                      | No Hit |
| DDR1                         | 0.4    |
| DDR2                         | 0      |
| DLK                          | No Hit |
| DMPK                         | No Hit |
| DMPK2                        | No Hit |
| DRAK1                        | No Hit |
| DRAK2                        | No Hit |
| DYRK1B                       | No Hit |
| EGFR                         | 1.1    |
| EGFR(E746-A750del)           | 0.9    |
| EGFR(G719C)                  | 0.1    |
| EGFR(G719S)                  | 0.3    |
| EGFR(L747-E749del,<br>A750P) | 0.1    |
| EGFR(L747-S752del,<br>P753S) | 0.3    |
| EGFR(L747-T751del,Sins)      | 0.15   |
| EGFR(L858R)                  | 0.7    |
| EGFR(L861Q)                  | 0.1    |

|                       |        |
|-----------------------|--------|
| EGFR(S752-I759del)    | 0      |
| EPHA1                 | No Hit |
| EPHA2                 | 1.5    |
| EPHA3                 | 0.1    |
| EPHA4                 | 2.7    |
| EPHA5                 | 4.8    |
| EPHA6                 | No Hit |
| EPHA7                 | No Hit |
| EPHA8                 | 0      |
| EPHB1                 | 3.6    |
| EPHB2                 | 3.8    |
| EPHB3                 | 27     |
| EPHB4                 | 13     |
| ERBB2                 | No Hit |
| ERBB4                 | 1.9    |
| ERK1                  | No Hit |
| ERK2                  | No Hit |
| ERK3                  | No Hit |
| ERK4                  | No Hit |
| ERK5                  | No Hit |
| ERK8                  | No Hit |
| FER                   | No Hit |
| FES                   | 22     |
| FGFR1                 | 32     |
| FGFR2                 | 27     |
| FGFR3                 | No Hit |
| FGFR3(G697C)          | No Hit |
| FGFR4                 | No Hit |
| FGR                   | 0.45   |
| FLT1                  | 9      |
| FLT3                  | 0.65   |
| FLT3(D835H)           | 3.2    |
| FLT3(D835Y)           | 15     |
| FLT3(ITD)             | 2.2    |
| FLT3(N841I)           | 0      |
| FLT4                  | 11     |
| FRK                   | 1.3    |
| FYN                   | 1.4    |
| GAK                   | 1      |
| GCN2(Kin.Dom.2,S808G) | 5.8    |
| GSK3A                 | No Hit |
| GSK3B                 | No Hit |
| HCK                   | 0.1    |
| IGF1R                 | No Hit |
| IKK-epsilon           | No Hit |
| INSR                  | No Hit |
| INSRR                 | No Hit |
| IRAK3                 | No Hit |
| ITK                   | No Hit |

|                  |        |
|------------------|--------|
| JAK1(Kin.Dom.1)  | No Hit |
| JAK2(Kin.Dom.2)  | No Hit |
| JAK3(Kin.Dom.2)  | 33     |
| JNK1             | No Hit |
| JNK2             | 24     |
| JNK3             | No Hit |
| KIT              | 0      |
| KIT(D816V)       | 11     |
| KIT(V559D)       | 0      |
| KIT(V559D,T670I) | 1      |
| KIT(V559D,V654A) | 6.8    |
| LATS1            | No Hit |
| LATS2            | No Hit |
| LCK              | 1      |
| LIMK1            | No Hit |
| LIMK2            | No Hit |
| LKB1             | No Hit |
| LOK              | 0.15   |
| LTK              | No Hit |
| LYN              | 0.65   |
| MAP3K4           | No Hit |
| MAP3K5           | No Hit |
| MAP4K1           | 7.6    |
| MAP4K3           | No Hit |
| MAP4K4           | 7.2    |
| MAP4K5           | 27     |
| MAPKAPK2         | No Hit |
| MAPKAPK5         | No Hit |
| MARK1            | No Hit |
| MARK2            | No Hit |
| MARK3            | No Hit |
| MARK4            | No Hit |
| MEK1             | No Hit |
| MEK2             | No Hit |
| MEK3             | No Hit |
| MEK4             | No Hit |
| MEK6             | No Hit |
| MELK             | No Hit |
| MERTK            | 36     |
| MET              | No Hit |
| MKNK1            | No Hit |
| MKNK2            | No Hit |
| MLCK             | No Hit |
| MLK1             | No Hit |
| MLK2             | No Hit |
| MLK3             | No Hit |
| MRCKA            | No Hit |
| MRCKB            | No Hit |
| MST1             | No Hit |

|               |        |
|---------------|--------|
| MST2          | No Hit |
| MST3          | No Hit |
| MST4          | No Hit |
| MUSK          | 3      |
| MYLK          | No Hit |
| MYLK2         | No Hit |
| MYO3A         | No Hit |
| MYO3B         | No Hit |
| NDR2          | No Hit |
| NEK1          | No Hit |
| NEK2          | No Hit |
| NEK5          | No Hit |
| NEK6          | No Hit |
| NEK7          | No Hit |
| NEK9          | No Hit |
| NLK           | 20     |
| p38-alpha     | 0.7    |
| p38-beta      | 1      |
| p38-gamma     | 28     |
| PAK1          | No Hit |
| PAK2          | No Hit |
| PAK3          | No Hit |
| PAK4          | No Hit |
| PAK6          | No Hit |
| PAK7/PAK5     | No Hit |
| PCTK1         | No Hit |
| PCTK2         | No Hit |
| PCTK3         | No Hit |
| PDGFRA        | 0.9    |
| PDGFRB        | 0.05   |
| PDPK1         | No Hit |
| PFTK1         | No Hit |
| PHKG1         | No Hit |
| PHKG2         | No Hit |
| PIK3CA        | 21     |
| PIK3CA(E545K) | No Hit |
| PIM1          | No Hit |
| PIM2          | No Hit |
| PIM3          | No Hit |
| PIP5K1A       | No Hit |
| PIP5K2B       | No Hit |
| PKAC-alpha    | No Hit |
| PKAC-beta     | No Hit |
| PKMYT1        | No Hit |
| PKN1          | No Hit |
| PKN2          | No Hit |
| PLK1          | No Hit |
| PLK3          | No Hit |
| PLK4          | No Hit |

|                    |        |
|--------------------|--------|
| PRKCD              | 14     |
| PRKCE              | No Hit |
| PRKCH              | No Hit |
| PRKCQ              | 30     |
| PRKD1              | No Hit |
| PRKD2              | No Hit |
| PRKD3              | No Hit |
| PRKG1              | No Hit |
| PRKG2              | No Hit |
| PRKR               | No Hit |
| PRKX               | No Hit |
| PTK2               | No Hit |
| PTK2B              | 26     |
| PTK6               | No Hit |
| RAF1               | 28     |
| RET                | 0.1    |
| RET(M918T)         | 0.1    |
| RIOK1              | No Hit |
| RIOK3              | No Hit |
| RIPK1              | 37     |
| RIPK2              | 16     |
| ROS1               | No Hit |
| RPS6KA1(Kin.Dom.1) | No Hit |
| RPS6KA1(Kin.Dom.2) | No Hit |
| RPS6KA2(Kin.Dom.1) | No Hit |
| RPS6KA2(Kin.Dom.2) | No Hit |
| RPS6KA3(Kin.Dom.1) | No Hit |
| RPS6KA4(Kin.Dom.1) | 25     |
| RPS6KA4(Kin.Dom.2) | No Hit |
| RPS6KA5(Kin.Dom.1) | No Hit |
| RPS6KA5(Kin.Dom.2) | No Hit |
| RPS6KA6(Kin.Dom.1) | No Hit |
| RPS6KA6(Kin.Dom.2) | No Hit |
| SgK085             | No Hit |
| SLK                | 23     |
| SNARK              | No Hit |
| SNF1LK             | 1.3    |
| SNF1LK2            | 32     |
| SRC                | 0.3    |
| SRMS               | 14     |
| SRPK1              | No Hit |
| SRPK2              | No Hit |
| STK16              | No Hit |
| STK33              | 36     |
| STK36              | 0.75   |
| SYK                | No Hit |
| TEC                | 4.8    |
| TESK1              | No Hit |
| TGFBR1             | No Hit |

|                 |        |
|-----------------|--------|
| TGFBR2          | 25     |
| TIE1            | 6.3    |
| TIE2            | 11     |
| TLK1            | No Hit |
| TLK2            | No Hit |
| TNIK            | 18     |
| TNK1            | No Hit |
| TNK2            | 30     |
| TNNI3K          | 3.1    |
| TRKA            | No Hit |
| TRKB            | No Hit |
| TRKC            | 20     |
| TSSK1           | No Hit |
| TTK             | No Hit |
| TXK             | 0.65   |
| TYK2(Kin.Dom.2) | No Hit |
| TYRO3           | No Hit |
| VEGFR2          | 16     |
| WEE1            | No Hit |
| YANK2           | No Hit |
| YANK3           | No Hit |
| YES             | 0.55   |
| YSK1            | No Hit |
| ZAK             | 0      |
| ZAP70           | No Hit |
